# Supplementary material for: Machine-Learning-Based Clinical Biomarker Using Cell-Free DNA for Hepatocellular Carcinoma (HCC)
Source: MDPI journal article supplement (doi:10.3390/cancers14092061), 2022-04-20
Supplement: s1 [file s1]

## Supplementary Material

### 1 Supplementary Figures and Tables

#### 1.1 Supplementary Figures

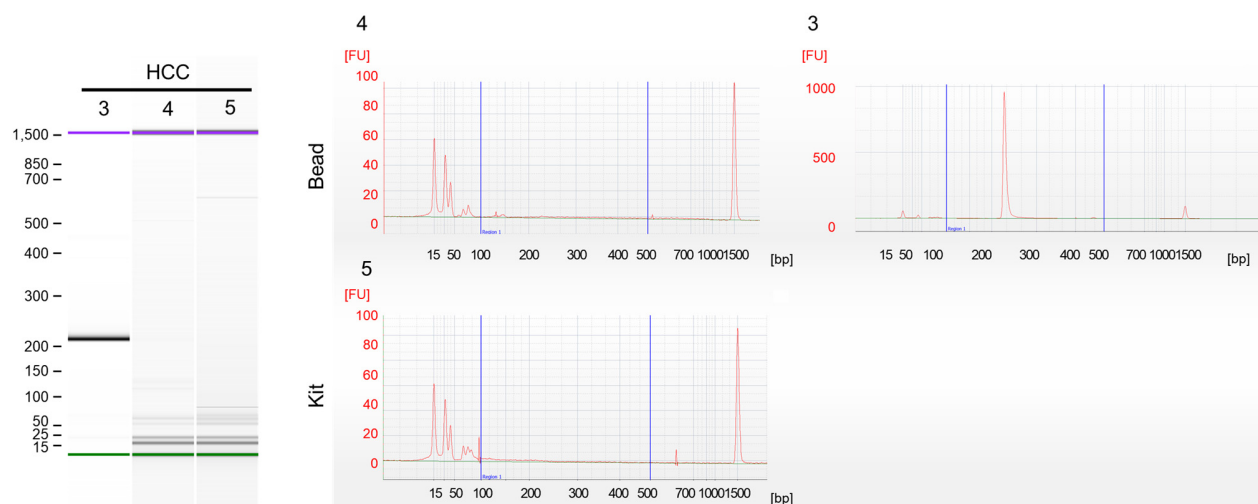

**Supplementary Figure S1.** Representative electropherograms and gel-like images of cfDNA obtained from HCC.

1.2

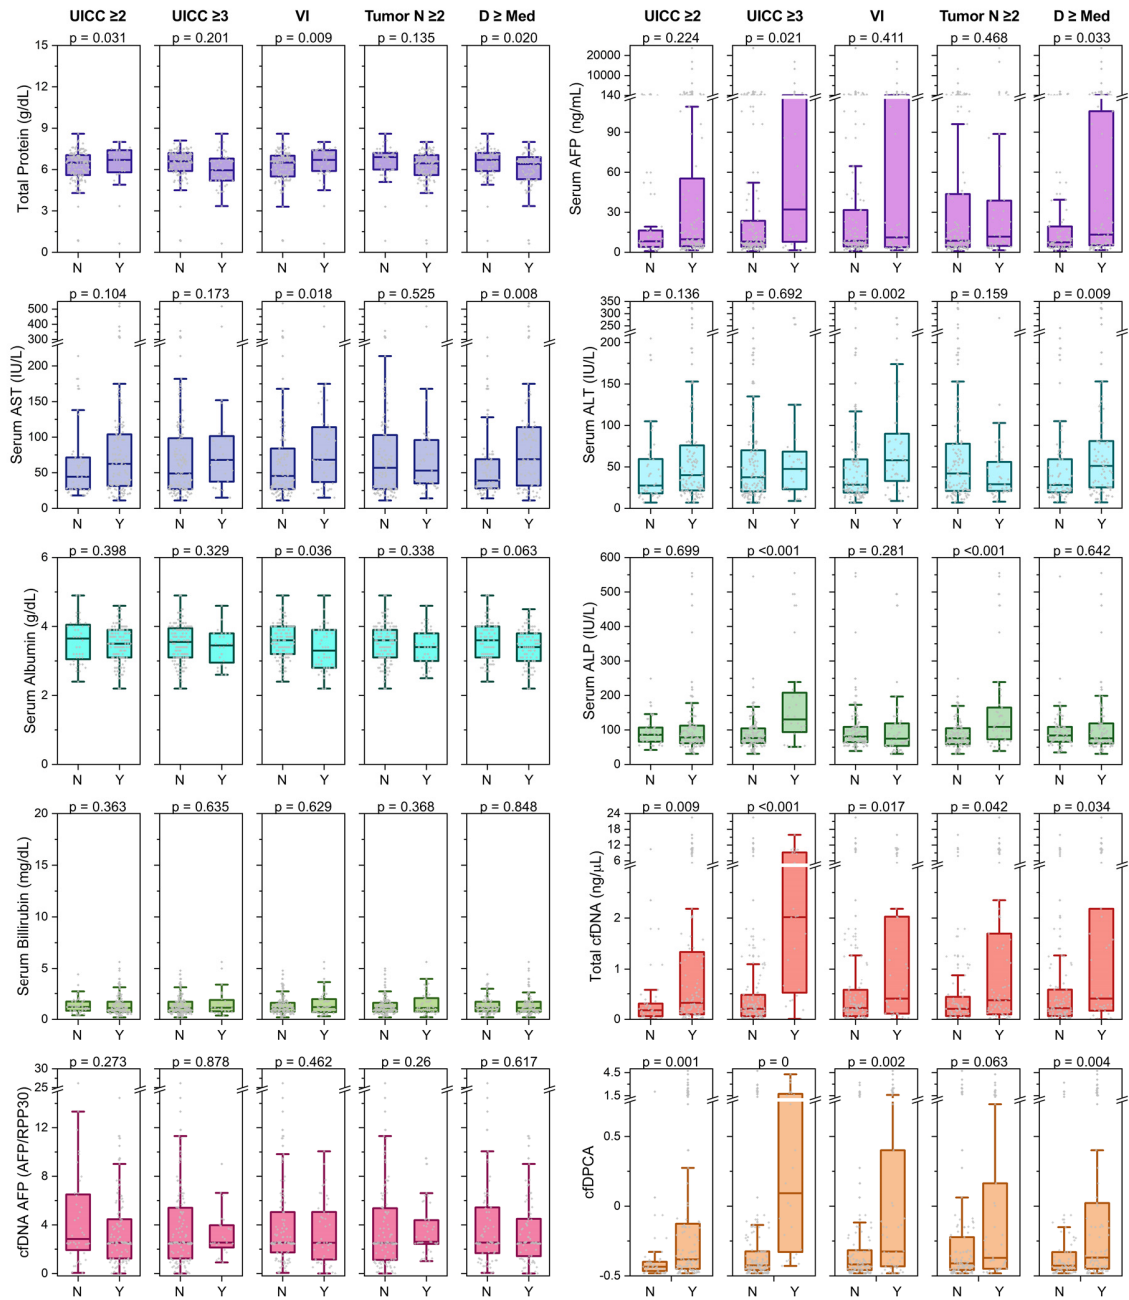

**Supplementary Figure S2.** The expression profiles of each biomarker depending on patients' pathological features.

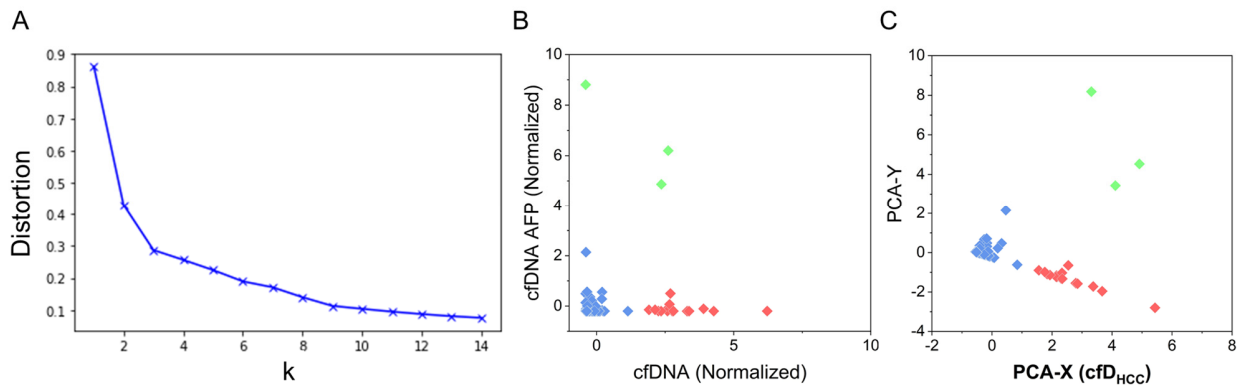

**Supplementary Figure S3. Elbow plot for determining the optimal  $k$  for  $k$ -means clustering.** (A)

Elbow plot for determining the optimal  $k$  for  $k$ -means clustering of HCC patients based on the expression profiles of cfDNA and relative amount of cfAFP DNA. (B) The expression profiles of cfDNA and cfAFP DNA for each cluster. (C) PCA applied to provide the best linear approximation for stratifying the clusters for cancer patients. The x-axis of the plot (PCA-X) was defined as cfDNA<sub>HCC</sub> Score, which was found to minimize the mean-squared reconstruction error of the clusters. Note that blue, red, and green represent cluster group 1, 2, and 3, respectively.

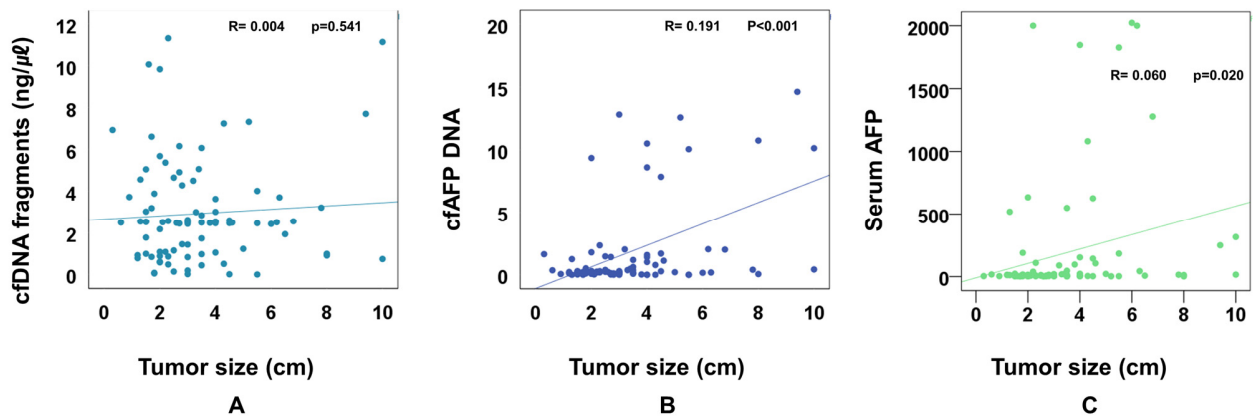

**Supplementary Figure S4. Tumor size showed diverse positive correlation coefficient.** The amount of plasma cfDNA fragments (A). cfAFP DNA (B). Serum AFP (C). The cfAFP DNA on PDA/silica-coated alginate beads showed a positive correlation coefficient with the tumor size, with Pearson's correlation coefficient of  $< 0.001$ .

### 1.3 Supplementary Tables

**Supplementary Table S1.** Demographic characteristics of the recruited cancer patients and non-cancer cohorts.

| Cohorts                      | Sex                                     | Age<br>(Years),<br>Median<br>(Range) | Height<br>(cm),<br>Median<br>(Range) | Weight<br>(kg),<br>Median<br>(Range) | Hyper-<br>tension | Diabetes          | Alcohol           | Smoke             | HBV Infection     |
|------------------------------|-----------------------------------------|--------------------------------------|--------------------------------------|--------------------------------------|-------------------|-------------------|-------------------|-------------------|-------------------|
| Cancer                       | Female: 32<br>Male: 120<br>(Total: 152) | 62<br>(46-85)                        | 165<br>(144-186)                     | 65<br>(41-120)                       | 61/152<br>(40.1%) | 53/152<br>(34.9%) | 47/152<br>(30.9%) | 53/152<br>(34.9%) | 88/152<br>(57.9%) |
| Liver Cirrhosis              | Female: 10<br>Male: 33<br>(Total: 43)   | 59<br>(31-75)                        | 164<br>(144-177)                     | 61<br>(41-104)                       | 8/43<br>(18.6%)   | 11/43<br>(25.6%)  | 21/43<br>(48.8%)  | 9/43<br>(20.9%)   | 7/43<br>(16.3%)   |
| Alcoholic Liver<br>Hepatitis | Female: 5<br>Male: 19<br>(Total: 24)    | 51.5<br>(28-76)                      | 167.6<br>(146-175)                   | 67<br>(50-110.8)                     | 2/24<br>(8.3%)    | 4/24<br>(16.7%)   | 19/24<br>(79.2%)  | 12/24<br>(50%)    | N/A               |
| Healthy Donors               | Female: 29<br>Male: 1<br>(Total: 30)    | 52.5<br>(33-70)                      | 155.5<br>(144-172)                   | 59.5<br>(46-78)                      | 9/30<br>(30%)     | 5/30<br>(16.7%)   | 10/30<br>(33.3%)  | 0/30<br>(0%)      | 0/30<br>(0%)      |

**Supplementary Table S2.** Expression profiles of cfDNA and serum enzymes for the recruited cancer patients and non-cancer cohorts.

| Cohorts                      | cfDNA                      |                      | Proteins (Enzymes)      |                      |                  |                  |                   |                   |                      |
|------------------------------|----------------------------|----------------------|-------------------------|----------------------|------------------|------------------|-------------------|-------------------|----------------------|
|                              | Total DNA<br>(ng/ $\mu$ L) | AFP<br>(vs.RPP30)    | Total Protein<br>(g/dL) | AFP<br>(ng/mL)       | AST<br>(IU/L)    | ALT<br>(IU/L)    | Albumin<br>(g/dL) | ALP<br>(IU/L)     | Bilirubin<br>(mg/dL) |
| HCC                          | 0.25<br>(0-22.5)           | 2.53<br>(0-26.7)     | 6.5<br>(0.63-8.6)       | 9.12<br>(0.91-23683) | 55<br>(11-538)   | 38.5<br>(7-344)  | 3.5<br>(2.2-4.9)  | 80<br>(31-555)    | 1.1<br>(0.19-5.64)   |
| Liver Cirrhosis              | 0.18<br>(0-15.22)          | 0.93<br>(0.01-14.06) | 6.9<br>(4.9-10.1)       | 4.2<br>(0.63-130)    | 39<br>(19-159)   | 26<br>(10-94)    | 3.3<br>(1.8-4.9)  | 282<br>(130-535)  | 1.4<br>(0.24-19.55)  |
| Alcoholic Liver<br>Hepatitis | 0.11<br>(0-0.29)           | 0.41<br>(0-3.95)     | 6.3<br>(4.9-8.1)        | 2.7<br>(1.2-155)     | 58.5<br>(24-360) | 26.5<br>(13-115) | 2.65<br>(1.8-4.5) | 107.5<br>(63-214) | 2.3<br>(1.2-18.0)    |
| Healthy Donors               | 0.06<br>(0-0.3)            | 0.04<br>(0.01-0.05)  | 7.3<br>(6.3-8.2)        | 2.95<br>(1.2-8)      | 7.3<br>(6.3-8.2) | 19<br>(7-34)     | 4.6<br>(4.0-5.1)  | 72.50<br>(46-134) | 0.76<br>(0.35-1.93)  |

**Supplementary Table S3.** Liquid biopsy marker level from cfDNA, cfAFP DNA, and serum AFP for all patients.

|       | Age   | cfDNA<br>Concentration | cfDNA(AFP) | serum<br>AFP |
|-------|-------|------------------------|------------|--------------|
| HCC1  | 56.00 | 0.48                   | 5.06       | 20.40        |
| HCC2  | 64.00 | 0.00                   | 4.56       | 11.63        |
| HCC3  | 78.00 | 12.57                  | 7.32       | 2.42         |
| HCC4  | 69.00 | 0.24                   | 1.43       | 5.44         |
| HCC5  | 46.00 | 0.29                   | 5.05       | 9.13         |
| HCC6  | 66.00 | 0.25                   | 2.52       | 15.85        |
| HCC7  | 59.00 | 0.37                   | 2.99       | 18.34        |
| HCC8  | 60.00 | 2.03                   | 4.50       | 88.76        |
| HCC9  | 54.00 | 0.00                   | 7.24       | 4.60         |
| HCC10 | 60.00 | 0.17                   | 2.17       | 3.12         |
| HCC11 | 49.00 | 0.21                   | 1.23       | 21.11        |
| HCC12 | 46.00 | 0.39                   | 4.65       | 9.80         |
| HCC13 | 67.00 | 14.61                  | 7.70       | 249.51       |
| HCC14 | 56.00 | 0.27                   | 5.68       | 634.00       |
| HCC15 | 59.00 | 0.01                   | 4.28       | 4.40         |
| HCC16 | 49.00 | 0.16                   | 10.06      | 3.80         |
| HCC17 | 52.00 | 0.43                   | 0.74       | 315.56       |
| HCC18 | 55.00 | 0.22                   | 6.61       | 1.91         |
| HCC19 | 46.00 | 0.29                   | 0.83       | 3.60         |
| HCC20 | 60.00 | 1.42                   | 4.91       | 5.68         |
| HCC21 | 50.00 | 1.64                   | 6.93       | 4.00         |
| HCC22 | 50.00 | 0.00                   | 0.00       | 1,826.73     |

|       |       |       |      |          |
|-------|-------|-------|------|----------|
| HCC23 | 70.00 | 0.00  | 0.02 | 17.28    |
| HCC24 | 47.00 | 0.11  | 1.45 | 14.12    |
| HCC25 | 58.00 | 0.19  | 5.37 | 2,000.00 |
| HCC26 | 48.00 | 0.31  | 0.58 | 7.96     |
| HCC27 | 51.00 | 0.19  | 0.99 | 4.00     |
| HCC28 | 68.00 | 10.05 | 4.01 | 183.39   |
| HCC29 | 68.00 | 0.18  | 1.77 | 22.45    |
| HCC30 | 52.00 | 22.50 | 1.93 | 7.54     |
| HCC31 | 59.00 | 10.74 | 0.91 | 12.28    |
| HCC32 | 53.00 | 0.29  | 0.48 | 109.19   |
| HCC33 | 74.00 | 0.21  | 0.88 | 10.67    |
| HCC34 | 48.00 | 0.06  | 3.72 | 4.08     |
| HCC35 | 58.00 | 0.11  | 0.78 | 11.87    |
| HCC36 | 53.00 | 1.40  | 1.05 | 11.75    |
| HCC37 | 63.00 | 0.11  | 3.88 | 3.02     |
| HCC38 | 66.00 | 0.06  | 0.99 | 1.78     |
| HCC39 | 84.00 | 0.10  | 0.97 | 2.95     |
| HCC40 | 63.00 | 0.08  | 0.61 | 14.66    |
| HCC41 | 53.00 | 0.09  | 0.44 | 4.68     |
| HCC42 | 60.00 | 0.62  | 6.07 | 46.12    |
| HCC43 | 80.00 | 1.27  | 0.48 | 2.87     |
| HCC44 | 48.00 | 0.25  | 0.86 | 8.49     |
| HCC45 | 66.00 | 1.47  | 1.15 | 6.92     |
| HCC46 | 72.00 | 0.24  | 0.14 | 11.70    |
| HCC47 | 55.00 | 0.18  | 0.19 | 5.97     |
| HCC48 | 64.00 | 0.52  | 0.08 | 189.20   |
| HCC49 | 72.00 | 0.30  | 0.05 | 16.82    |
| HCC50 | 74.00 | 0.38  | 4.42 | 64.58    |

|       |       |       |       |           |
|-------|-------|-------|-------|-----------|
| HCC51 | 59.00 | 0.08  | 6.61  | 6.85      |
| HCC52 | 61.00 | 0.00  | 4.11  | 23,683.00 |
| HCC53 | 48.00 | 10.21 | 6.41  | 16,832.00 |
| HCC54 | 83.00 | 0.46  | 9.02  | 6.20      |
| HCC55 | 58.00 | 2.18  | 1.95  | 1.49      |
| HCC56 | 70.00 | 9.39  | 6.63  | 13,333.00 |
| HCC57 | 57.00 | 10.19 | 3.01  | 17.70     |
| HCC58 | 55.00 | 0.00  | 0.60  | 43.68     |
| HCC59 | 58.00 | 8.99  | 1.23  | 9.50      |
| HCC60 | 62.00 | 0.10  | 1.02  | 24.38     |
| HCC61 | 78.00 | 0.53  | 5.46  | 1,478.04  |
| HCC62 | 54.00 | 0.28  | 1.68  | 59.83     |
| HCC63 | 69.00 | 0.35  | 0.11  | 1.60      |
| HCC64 | 63.00 | 0.26  | 5.05  | 4.05      |
| HCC65 | 67.00 | 0.41  | 5.98  | 4.84      |
| HCC66 | 63.00 | 0.44  | 6.41  | 0.91      |
| HCC67 | 69.00 | 0.70  | 14.45 | 3.20      |
| HCC68 | 57.00 | 0.64  | 10.51 | 40.34     |
| HCC69 | 66.00 | 1.25  | 9.36  | 3.61      |
| HCC70 | 82.00 | 0.39  | 26.17 | 4.80      |
| HCC71 | 70.00 | 0.14  | 4.39  | 8.20      |
| HCC72 | 70.00 | 0.00  | 9.48  | 6.11      |
| HCC73 | 60.00 | 0.32  | 1.12  | 6.12      |
| HCC74 | 84.00 | 0.00  | 1.67  | 5.83      |
| HCC75 | 66.00 | 0.78  | 0.51  | 1,081.10  |
| HCC76 | 65.00 | 0.10  | 0.84  | 2.33      |
| HCC77 | 69.00 | 0.06  | 2.43  | 229.50    |
| HCC78 | 51.00 | 0.08  | 5.92  | 30.89     |



|        |       |       |       |          |
|--------|-------|-------|-------|----------|
| HCC79  | 72.00 | 0.36  | 1.73  | 13.10    |
| HCC80  | 71.00 | 0.14  | 1.80  | 39.31    |
| HCC81  | 71.00 | 0.58  | 13.33 | 142.86   |
| HCC82  | 80.00 | 0.13  | 11.82 | 52.19    |
| HCC83  | 77.00 | 1.79  | 9.83  | 2.08     |
| HCC84  | 59.00 | 0.05  | 3.45  | 31.70    |
| HCC85  | 74.00 | 0.19  | 11.31 | 3.40     |
| HCC86  | 78.00 | 0.88  | 6.38  | 7.36     |
| HCC87  | 69.00 | 10.13 | 11.13 | 15.79    |
| HCC88  | 70.00 | 0.22  | 3.36  | 158.32   |
| HCC89  | 64.00 | 0.45  | 7.66  | 9.10     |
| HCC90  | 59.00 | 0.03  | 6.16  | 2.95     |
| HCC91  | 65.00 | 0.00  | 7.64  | 11.51    |
| HCC92  | 52.00 | 0.58  | 3.94  | 25.50    |
| HCC93  | 75.00 | 1.18  | 2.84  | 1.74     |
| HCC94  | 83.00 | 0.00  | 5.83  | 4.86     |
| HCC95  | 70.00 | 0.07  | 5.44  | 8.80     |
| HCC96  | 54.00 | 0.14  | 6.60  | 6.70     |
| HCC97  | 72.00 | 10.41 | 7.98  | 716.33   |
| HCC98  | 48.00 | 0.17  | 9.16  | 2.96     |
| HCC99  | 71.00 | 0.28  | 0.01  | 625.79   |
| HCC100 | 50.00 | 0.10  | 2.61  | 6.37     |
| HCC101 | 73.00 | 0.15  | 2.50  | 7.60     |
| HCC102 | 63.00 | 12.81 | 2.54  | 3.71     |
| HCC103 | 51.00 | 2.04  | 2.51  | 2,000.00 |
| HCC104 | 60.00 | 2.35  | 2.56  | 5.11     |
| HCC105 | 57.00 | 2.01  | 2.55  | 1,278.06 |
| HCC106 | 49.00 | 0.24  | 2.61  | 2.98     |

|        |       |       |      |          |
|--------|-------|-------|------|----------|
| HCC107 | 60.00 | 10.50 | 2.54 | 1,846.58 |
| HCC108 | 76.00 | 0.00  | 2.52 | 6.20     |
| HCC109 | 73.00 | 0.01  | 1.20 | 6.84     |
| HCC110 | 64.00 | 0.00  | 3.66 | 896.03   |
| HCC111 | 72.00 | 0.01  | 2.33 | 6,160.00 |
| HCC112 | 61.00 | 9.35  | 1.08 | 7.20     |
| HCC113 | 64.00 | 10.88 | 1.25 | 9.74     |
| HCC114 | 75.00 | 0.06  | 1.22 | 2.74     |
| HCC115 | 51.00 | 0.25  | 1.08 | 38.76    |
| HCC116 | 60.00 | 0.22  | 0.92 | 14.53    |
| HCC117 | 61.00 | 0.03  | 2.48 | 96.16    |
| HCC118 | 50.00 | 0.18  | 3.70 | 43.41    |
| HCC119 | 68.00 | 7.84  | 2.59 | 143.42   |
| HCC120 | 52.00 | 0.03  | 3.02 | 2.28     |
| HCC121 | 71.00 | 5.22  | 2.53 | 4.86     |
| HCC122 | 57.00 | 8.60  | 3.62 | 153.10   |
| HCC123 | 62.00 | 0.03  | 2.51 | 6.46     |
| HCC124 | 64.00 | 0.00  | 3.19 | 4.31     |
| HCC125 | 68.00 | 1.10  | 2.54 | 2.94     |
| HCC126 | 64.00 | 0.49  | 3.11 | 4.08     |
| HCC127 | 85.00 | 0.00  | 2.53 | 2.85     |
| HCC128 | 62.00 | 0.34  | 3.85 | 5.58     |
| HCC129 | 48.00 | 0.66  | 2.51 | 85.79    |
| HCC130 | 72.00 | 0.02  | 2.56 | 3.00     |
| HCC131 | 73.00 | 0.36  | 2.49 | 17.18    |
| HCC132 | 48.00 | 0.40  | 3.21 | 14.80    |
| HCC133 | 62.00 | 0.00  | 2.46 | 3.29     |
| HCC134 | 52.00 | 1.02  | 3.01 | 3.65     |

|        |       |       |      |          |
|--------|-------|-------|------|----------|
| HCC135 | 64.00 | 0.01  | 2.41 | 8.38     |
| HCC136 | 73.00 | 0.12  | 2.44 | 22.90    |
| HCC137 | 48.00 | 0.04  | 2.53 | 14.61    |
| HCC138 | 74.00 | 0.00  | 2.54 | 6.62     |
| HCC139 | 72.00 | 1.70  | 2.46 | 3.07     |
| HCC140 | 47.00 | 0.03  | 2.43 | 19.24    |
| HCC141 | 60.00 | 1.58  | 2.46 | 22.19    |
| HCC142 | 66.00 | 0.00  | 2.43 | 8.66     |
| HCC143 | 62.00 | 15.88 | 2.47 | 3.59     |
| HCC144 | 62.00 | 0.22  | 2.48 | 1.82     |
| HCC145 | 53.00 | 0.03  | 2.53 | 4.12     |
| HCC146 | 71.00 | 1.12  | 2.49 | 105.70   |
| HCC147 | 55.00 | 1.25  | 2.54 | 518.50   |
| HCC148 | 74.00 | 0.18  | 2.49 | 549.20   |
| HCC149 | 62.00 | 0.16  | 2.42 | 2,023.00 |
| HCC150 | 48.00 | 1.09  | 2.48 | 10.23    |
| HCC151 | 58.00 | 0.21  | 2.49 | 7.18     |
| HCC152 | 57.00 | 0.12  | 2.45 | 5.72     |
| LC1    | 48.00 | 0.00  | 1.08 | 8.20     |
| LC2    | 50.00 | 0.52  | 0.93 | 13.00    |
| LC3    | 50.00 | 0.00  | 0.02 | 1.50     |
| LC4    | 68.00 | 1.14  | 0.01 | 5.20     |
| LC5    | 65.00 | 0.30  | 0.03 | 8.10     |
| LC6    | 59.00 | 0.65  | 0.02 | 5.30     |
| LC7    | 53.00 | 0.40  | 0.02 | 3.40     |
| LC8    | 47.00 | 0.30  | 0.01 | 4.20     |
| LC9    | 70.00 | 0.02  | 0.03 | 2.90     |
| LC10   | 51.00 | 0.81  | 0.02 | 1.20     |

|      |       |       |       |        |
|------|-------|-------|-------|--------|
| LC11 | 68.00 | 0.33  | 0.01  | 5.70   |
| LC12 | 56.00 | 0.50  | 0.40  | 6.00   |
| LC13 | 72.00 | 0.00  | 0.05  | 57.20  |
| LC14 | 63.00 | 0.00  | 0.05  | 5.20   |
| LC15 | 75.00 | 8.80  | 0.07  | 3.80   |
| LC16 | 68.00 | 0.00  | 0.97  | 2.90   |
| LC17 | 53.00 | 0.44  | 0.82  | 4.80   |
| LC18 | 63.00 | 0.08  | 0.15  | 2.82   |
| LC19 | 59.00 | 0.27  | 0.92  | 0.63   |
| LC20 | 61.00 | 0.98  | 0.91  | 1.80   |
| LC21 | 62.00 | 10.52 | 0.73  | 8.90   |
| LC22 | 42.00 | 0.13  | 6.82  | 3.50   |
| LC23 | 31.00 | 0.11  | 0.96  | 42.70  |
| LC24 | 46.00 | 0.00  | 0.88  | 12.60  |
| LC25 | 69.00 | 0.04  | 2.13  | 2.50   |
| LC26 | 57.00 | 0.00  | 8.30  | 4.40   |
| LC27 | 50.00 | 0.44  | 0.99  | 3.20   |
| LC28 | 52.00 | 0.06  | 2.22  | 7.20   |
| LC29 | 44.00 | 0.00  | 1.67  | 2.60   |
| LC30 | 75.00 | 11.49 | 1.89  | 130.00 |
| LC31 | 61.00 | 0.00  | 14.06 | 2.50   |
| LC32 | 42.00 | 0.00  | 2.99  | 3.90   |
| LC33 | 42.00 | 0.00  | 3.24  | 2.60   |
| LC34 | 71.00 | 0.30  | 1.11  | 9.70   |
| LC35 | 75.00 | 0.19  | 1.22  | 3.10   |
| LC36 | 73.00 | 0.06  | 0.92  | 3.70   |
| LC37 | 46.00 | 0.07  | 6.67  | 3.70   |
| LC38 | 60.00 | 0.00  | 3.37  | 24.80  |

|      |       |       |      |        |
|------|-------|-------|------|--------|
| LC39 | 38.00 | 0.20  | 2.68 | 3.46   |
| LC40 | 62.00 | 11.05 | 0.87 | 8.89   |
| LC41 | 52.00 | 0.18  | 1.06 | 6.43   |
| LC42 | 57.00 | 15.22 | 1.39 | 1.98   |
| LC43 | 60.00 | 0.00  | 8.79 | 11.54  |
| LA1  | 55.00 | 0.12  | 1.14 | 5.30   |
| LA2  | 50.00 | 0.00  | 1.11 | 2.80   |
| LA3  | 28.00 | 0.00  | 1.64 | 1.30   |
| LA4  | 38.00 | 0.00  | 1.26 | 2.20   |
| LA5  | 43.00 | 0.11  | 1.24 | 155.00 |
| LA6  | 44.00 | 0.10  | 3.12 | 2.30   |
| LA7  | 41.00 | 0.16  | 3.95 | 3.00   |
| LA8  | 76.00 | 0.04  | 0.97 | 4.40   |
| LA9  | 58.00 | 0.25  | 0.81 | 1.30   |
| LA10 | 56.00 | 0.17  | 0.90 | 9.50   |
| LA11 | 44.00 | 0.04  | 1.01 | 3.00   |
| LA12 | 51.00 | 0.06  | 1.54 | 5.30   |
| LA13 | 52.00 | 0.16  | 0.00 | 2.50   |
| LA14 | 75.00 | 0.16  | 0.00 | 1.90   |
| LA15 | 56.00 | 0.25  | 0.01 | 1.60   |
| LA16 | 64.00 | 0.29  | 0.00 | 4.30   |
| LA17 | 48.00 | 0.03  | 0.01 | 3.20   |
| LA18 | 58.00 | 0.02  | 0.01 | 7.40   |
| LA19 | 40.00 | 0.11  | 0.00 | 1.20   |
| LA20 | 72.00 | 0.18  | 0.00 | 2.70   |
| LA21 | 55.00 | 0.16  | 0.00 | 1.20   |
| LA22 | 62.00 | 0.23  | 0.00 | 2.70   |
| LA23 | 47.00 | 0.00  | 0.00 | 2.50   |

|      |       |      |      |      |
|------|-------|------|------|------|
| LA24 | 48.00 | 0.22 | 0.00 | 2.10 |
| HC1  | 55.00 | 0.21 | 0.03 | 3.50 |
| HC2  | 38.00 | 0.00 | 0.02 | 1.20 |
| HC3  | 53.00 | 0.10 | 0.01 | 4.60 |
| HC4  | 55.00 | 0.06 | 0.03 | 2.10 |
| HC5  | 55.00 | 0.10 | 0.03 | 4.20 |
| HC6  | 50.00 | 0.30 | 0.01 | 2.60 |
| HC7  | 56.00 | 0.00 | 0.01 | 4.60 |
| HC8  | 49.00 | 0.07 | 0.03 | 7.10 |
| HC9  | 52.00 | 0.06 | 0.01 | 3.30 |
| HC10 | 55.00 | 0.00 | 0.02 | 6.10 |
| HC11 | 54.00 | 0.20 | 0.04 | 2.80 |
| HC12 | 59.00 | 0.02 | 0.02 | 4.80 |
| HC13 | 52.00 | 0.09 | 0.02 | 4.40 |
| HC14 | 50.00 | 0.08 | 0.02 | 7.20 |
| HC15 | 61.00 | 0.11 | 0.13 | 1.60 |
| HC16 | 48.00 | 0.07 | 0.39 | 3.60 |
| HC17 | 60.00 | 0.18 | 0.78 | 2.40 |
| HC18 | 45.00 | 0.07 | 0.10 | 2.20 |
| HC19 | 35.00 | 0.00 | 0.10 | 3.10 |
| HC20 | 66.00 | 0.00 | 0.03 | 2.20 |
| HC21 | 33.00 | 0.03 | 0.05 | 1.20 |
| HC22 | 51.00 | 0.08 | 0.11 | 1.50 |
| HC23 | 63.00 | 0.00 | 0.14 | 1.60 |
| HC24 | 35.00 | 0.00 | 0.27 | 7.50 |
| HC25 | 67.00 | 0.00 | 0.14 | 6.60 |
| HC26 | 49.00 | 0.00 | 0.28 | 2.40 |
| HC27 | 65.00 | 0.00 | 0.12 | 1.60 |

|      |       |      |      |      |
|------|-------|------|------|------|
| HC28 | 70.00 | 0.03 | 0.06 | 1.80 |
| HC29 | 42.00 | 0.06 | 0.07 | 1.60 |
| HC30 | 50.00 | 0.00 | 0.05 | 3.80 |

**Supplementary Table S4.** AUC-ROC values for detecting HCC from NC, LC, LA, and HD.

|                            | VS. NC                                        | VS. LC                                         | VS. LA                                         | VS. HD                                        |
|----------------------------|-----------------------------------------------|------------------------------------------------|------------------------------------------------|-----------------------------------------------|
| cfDNA<br>(ng/ $\mu$ L)     | 0.688 $\pm$ 0.034<br>(0.621-0.755; p <0.0001) | 0.713 $\pm$ 0.041<br>(0.632-0.794; p = 0.001)  | 0.592 $\pm$ 0.052<br>(0.490-0.694; p = 0.066)  | 0.805 $\pm$ 0.034<br>(0.739-0.871; p <0.0001) |
| cfAFP-DNA<br>(vs. RPP30)   | 0.843 $\pm$ 0.027<br>(0.790-0.897; p <0.0001) | 0.861 $\pm$ 0.040<br>(0.783-0.940 p <0.0001)   | 0.744 $\pm$ 0.047<br>(0.651-0.837; p <0.0001)  | 0.971 $\pm$ 0.012<br>(0.948-0.994; p <0.0001) |
| Total Protein<br>(g/dL)    | 0.361 $\pm$ 0.035<br>(0.292-0.429; p <0.0001) | 0.522 $\pm$ 0.058<br>(0.409-0.635; p = 0.727)  | 0.377 $\pm$ 0.0435<br>(0.288-0.465; p = 0.014) | 0.208 $\pm$ 0.036<br>(0.137-0.279; p <0.0001) |
| Serum AFP<br>(ng/mL)       | 0.780 $\pm$ 0.029<br>(0.723-0.837; p <0.0001) | 0.836 $\pm$ 0.044<br>(0.750-0.922; p <0.0001)  | 0.706 $\pm$ 0.042<br>(0.624-0.787; p <0.0001)  | 0.840 $\pm$ 0.032<br>(0.777-0.904; p <0.0001) |
| Serum AST<br>(IU/L)        | 0.638 $\pm$ 0.035<br>(0.569-0.708; p <0.0001) | 0.422 $\pm$ 0.052<br>(0.321-0.523; p = 0.221)  | 0.567 $\pm$ 0.043<br>(0.483-0.651; p = 0.179)  | 0.913 $\pm$ 0.021<br>(0.872-0.954; p <0.0001) |
| Serum ALT<br>(IU/L)        | 0.649 $\pm$ 0.035<br>(0.582-0.718; p <0.0001) | 0.582 $\pm$ 0.057<br>(0.470-0.695; p = 0.195)  | 0.608 $\pm$ 0.044<br>(0.521-0.695; p = 0.031)  | 0.763 $\pm$ 0.036<br>(0.692-0.833; p = 0.031) |
| Serum Albumin<br>(g/dL)    | 0.445 $\pm$ 0.042<br>(0.362-0.528; p = 0.145) | 0.813 $\pm$ 0.053<br>(0.708-0.917; p <0.0001)  | 0.528 $\pm$ 0.055<br>(0.419-0.636; p = 0.582)  | 0.033 $\pm$ 0.012<br>(0.009-0.057; p <0.0001) |
| Serum ALP<br>(IU/L)        | 0.280 $\pm$ 0.034<br>(0.214-0.346; p <0.0001) | 0.327 $\pm$ 0.048<br>(0.232-0.422; p = 0.007)  | 0.044 $\pm$ 0.015<br>(0.016-0.073; p <0.0001)  | 0.581 $\pm$ 0.047<br>(0.489-0.673; p = 0.161) |
| Serum Bilirubin<br>(mg/dL) | 0.446 $\pm$ 0.038<br>(0.371-0.522; p = 0.152) | 0.157 $\pm$ 0.036<br>(0.0086-0.229; p <0.0001) | 0.425 $\pm$ 0.054<br>(0.319-0.531; p = 0.134)  | 0.707 $\pm$ 0.040<br>(0.629-0.785; p <0.0001) |

\* NC: Non-cancer cohorts (LC + LA + HD); LC: Liver cirrhosis; LA: Alcoholic liver hepatitis; HD: Healthy donors



**Supplementary Table S5.** Diagnostic performance of serum enzymes, plasma cfDNA, and cfAFP DNA for detecting HCC patients. Note that the diagnostic performance of each biomarker was determined at the threshold which results in the highest accuracy with specificity higher than 0.7.

|                 | <i>vs. Non-cancer Cohorts (NC)</i> |             |          |       |       | <i>vs. Patients with Alcoholic Liver Hepatitis (LA)</i> |             |          |       |       |
|-----------------|------------------------------------|-------------|----------|-------|-------|---------------------------------------------------------|-------------|----------|-------|-------|
|                 | Sensitivity                        | Specificity | Accuracy | PPV   | NPV   | Sensitivity                                             | Specificity | Accuracy | PPV   | NPV   |
| cfDNA           | 0.579                              | 0.732       | 0.639    | 0.772 | 0.526 | 0.625                                                   | 0.792       | 0.648    | 0.950 | 0.250 |
| cfAFP-DNA       | 0.796                              | 0.784       | 0.791    | 0.852 | 0.710 | 0.796                                                   | 0.750       | 0.790    | 0.953 | 0.367 |
| Total Protein   | 0.007                              | 0.990       | 0.390    | 0.500 | 0.389 | 0.382                                                   | 0.750       | 0.432    | 0.906 | 0.161 |
| Serum AFP       | 0.691                              | 0.753       | 0.715    | 0.814 | 0.608 | 0.842                                                   | 0.708       | 0.824    | 0.948 | 0.415 |
| Serum AST       | 0.493                              | 0.753       | 0.594    | 0.758 | 0.487 | 0.289                                                   | 0.750       | 0.352    | 0.88  | 0.143 |
| Serum ALT       | 0.513                              | 0.763       | 0.610    | 0.772 | 0.500 | 0.500                                                   | 0.708       | 0.528    | 0.916 | 0.183 |
| Serum Albumin   | 0                                  | 0.990       | 0.386    | 0     | 0.387 | 0.809                                                   | 0.708       | 0.795    | 0.946 | 0.37  |
| Serum ALP       | 0.013                              | 1           | 0.398    | 1     | 0.393 | 0.224                                                   | 0.708       | 0.290    | 0.829 | 0.126 |
| Serum Bilirubin | 0                                  | 0.990       | 0.386    | 0     | 0.387 | 0                                                       | 0.958       | 0.131    | 0     | 0.131 |

  

|                 | <i>vs. Patients with Liver Cirrhosis (LC)</i> |             |          |       |       | <i>vs. Healthy Donors (HD)</i> |             |          |       |       |
|-----------------|-----------------------------------------------|-------------|----------|-------|-------|--------------------------------|-------------|----------|-------|-------|
|                 | Sensitivity                                   | Specificity | Accuracy | PPV   | NPV   | Sensitivity                    | Specificity | Accuracy | PPV   | NPV   |
| cfDNA           | 0.355                                         | 0.744       | 0.441    | 0.831 | 0.246 | 0.750                          | 0.767       | 0.753    | 0.942 | 0.377 |
| cfAFP-DNA       | 0.743                                         | 0.721       | 0.738    | 0.904 | 0.443 | 0.947                          | 0.967       | 0.951    | 0.993 | 0.784 |
| Total Protein   | 0.164                                         | 0.791       | 0.303    | 0.735 | 0.211 | 0.033                          | 0.967       | 0.187    | 0.833 | 0.165 |
| Serum AFP       | 0.566                                         | 0.721       | 0.600    | 0.878 | 0.320 | 0.730                          | 0.800       | 0.742    | 0.949 | 0.369 |
| Serum AST       | 0.474                                         | 0.744       | 0.533    | 0.867 | 0.286 | 0.855                          | 0.867       | 0.857    | 0.970 | 0.542 |
| Serum ALT       | 0.421                                         | 0.814       | 0.508    | 0.889 | 0.285 | 0.658                          | 0.767       | 0.676    | 0.935 | 0.307 |
| Serum Albumin   | 0.151                                         | 0.744       | 0.282    | 0.676 | 0.199 | 0                              | 0.967       | 0.159    | 0     | 0.16  |
| Serum ALP       | 0.013                                         | 1           | 0.231    | 1     | 0.223 | 0.434                          | 0.733       | 0.484    | 0.892 | 0.204 |
| Serum Bilirubin | 0.158                                         | 0.721       | 0.282    | 0.667 | 0.195 | 0.618                          | 0.833       | 0.654    | 0.949 | 0.301 |

**Supplementary Table S6.** Clinical characteristics of recruited HCC patients. Note that the numbers represent the median (IQR) for each biomarker used in this study.

|               | No. of Patients | cfD <sub>HCC</sub> Score (AU) | cfDNA (ng/ $\mu$ L) | cfAFP DNA (vs. RPP30) | Total Protein (g/dL) | AFP (ng/mL)           | AST (IU/L)          | ALT (IU/L)        | Albumin (g/dL)  | ALP (IU/L)          | Bilirubin (mg/dL) |
|---------------|-----------------|-------------------------------|---------------------|-----------------------|----------------------|-----------------------|---------------------|-------------------|-----------------|---------------------|-------------------|
| UICC Stage    |                 |                               |                     |                       |                      |                       |                     |                   |                 |                     |                   |
| I             | 40              | -0.40 $\pm$ 0.46              | 0.55 $\pm$ 1.67     | 4.68 $\pm$ 4.81       | 6.51 $\pm$ 1.35      | 56.82 $\pm$ 151.46    | 60.77 $\pm$ 50.35   | 48.26 $\pm$ 48.01 | 3.57 $\pm$ 0.63 | 93.65 $\pm$ 42.26   | 1.37 $\pm$ 0.81   |
| II            | 88              | -0.06 $\pm$ 1.1               | 1.57 $\pm$ 3.91     | 3.39 $\pm$ 2.92       | 6.12 $\pm$ 1.05      | 436.91 $\pm$ 2546.82  | 81.04 $\pm$ 84.71   | 64.46 $\pm$ 68.99 | 3.48 $\pm$ 0.52 | 86.88 $\pm$ 60.65   | 1.32 $\pm$ 0.93   |
| III           | 17              | 0.26 $\pm$ 1.09               | 2.65 $\pm$ 4.17     | 2.77 $\pm$ 1.04       | 6.69 $\pm$ 0.90      | 623.52 $\pm$ 1579.16  | 85.44 $\pm$ 87.14   | 62.44 $\pm$ 65.38 | 3.51 $\pm$ 0.51 | 136.31 $\pm$ 87.42  | 1.42 $\pm$ 1.08   |
| IV            | 7               | 2.14 $\pm$ 1.80               | 7.78 $\pm$ 4.05     | 4.15 $\pm$ 2.93       | 5.60 $\pm$ 2.47      | 3799.45 $\pm$ 7026.81 | 132.38 $\pm$ 161.37 | 67.63 $\pm$ 82.63 | 3.19 $\pm$ 0.51 | 277.00 $\pm$ 194.10 | 1.97 $\pm$ 1.83   |
| TACE Treated  |                 |                               |                     |                       |                      |                       |                     |                   |                 |                     |                   |
| No            | 109             | 0.01 $\pm$ 1.13               | 1.87 $\pm$ 3.93     | 3.36 $\pm$ 3.38       | 6.20 $\pm$ 1.13      | 352.60 $\pm$ 1738.42  | 88.63 $\pm$ 94.21   | 72.41 $\pm$ 71.21 | 3.50 $\pm$ 0.57 | 90.95 $\pm$ 69.67   | 1.34 $\pm$ 0.96   |
| Yes           | 43              | -0.01 $\pm$ 1.21              | 1.42 $\pm$ 3.44     | 4.55 $\pm$ 3.48       | 6.39 $\pm$ 1.49      | 992.07 $\pm$ 4095.92  | 54.14 $\pm$ 38.18   | 29.07 $\pm$ 20.81 | 3.46 $\pm$ 0.51 | 136.60 $\pm$ 105.31 | 1.49 $\pm$ 1.05   |
| LVI           |                 |                               |                     |                       |                      |                       |                     |                   |                 |                     |                   |
| No            | 106             | -0.20 $\pm$ 0.82              | 1.13 $\pm$ 2.78     | 3.86 $\pm$ 3.73       | 6.40 $\pm$ 1.15      | 333.7 $\pm$ 2315.74   | 72.30 $\pm$ 80.13   | 53.48 $\pm$ 63.69 | 3.56 $\pm$ 0.50 | 104.08 $\pm$ 79.70  | 1.32 $\pm$ 0.87   |
| Yes           | 46              | 0.45 $\pm$ 1.60               | 3.16 $\pm$ 5.23     | 3.32 $\pm$ 2.62       | 5.92 $\pm$ 1.38      | 993.92 $\pm$ 3219.91  | 94.01 $\pm$ 90.34   | 75.51 $\pm$ 63.63 | 3.34 $\pm$ 0.63 | 103.39 $\pm$ 92.78  | 1.53 $\pm$ 1.2    |
| Multifocality |                 |                               |                     |                       |                      |                       |                     |                   |                 |                     |                   |
| No            | 111             | -0.11 $\pm$ 1.03              | 1.44 $\pm$ 3.63     | 3.79 $\pm$ 3.82       | 6.21 $\pm$ 1.20      | 329.05 $\pm$ 1431.91  | 78.07 $\pm$ 80.12   | 65.80 $\pm$ 69.12 | 3.52 $\pm$ 0.56 | 84.34 $\pm$ 37.91   | 1.31 $\pm$ 0.91   |
| Yes           | 41              | 0.31 $\pm$ 1.39               | 2.56 $\pm$ 4.14     | 3.47 $\pm$ 2.07       | 6.39 $\pm$ 1.35      | 1087.01 $\pm$ 4474.57 | 81.05 $\pm$ 93.55   | 44.85 $\pm$ 46.13 | 3.42 $\pm$ 0.52 | 156.73 $\pm$ 135.95 | 1.56 $\pm$ 1.14   |
| Tumor Size    |                 |                               |                     |                       |                      |                       |                     |                   |                 |                     |                   |
| < 2.3 cm      | 73              | -0.26 $\pm$ 0.75              | 1.05 $\pm$ 2.80     | 4.06 $\pm$ 4.10       | 6.48 $\pm$ 1.14      | 84.61 $\pm$ 279.16    | 59.87 $\pm$ 53.06   | 47.58 $\pm$ 49.56 | 3.59 $\pm$ 0.56 | 96.70 $\pm$ 65.41   | 1.32 $\pm$ 0.8    |
| $\geq$ 2.3 cm | 79              | 0.24 $\pm$ 1.38               | 2.39 $\pm$ 4.44     | 3.37 $\pm$ 2.66       | 6.05 $\pm$ 1.31      | 948.31 $\pm$ 3597.9   | 96.43 $\pm$ 101.47  | 71.76 $\pm$ 73.79 | 3.40 $\pm$ 0.53 | 110.49 $\pm$ 97.34  | 1.43 $\pm$ 1.12   |

**Supplementary Table S7.** AUC-ROC values of the biomarkers for determining the pathological features of HCC tumors.

|                            | UICC $\geq 2$                                 | UICC $\geq 3$                                | VI                                             | TUMOR N $\geq 2$                              | SIZE $\geq$ MEDIAN                            |
|----------------------------|-----------------------------------------------|----------------------------------------------|------------------------------------------------|-----------------------------------------------|-----------------------------------------------|
| cfDHCC<br>(Normalized)     | 0.673 $\pm$ 0.046<br>(0.583-0.763; p = 0.001) | 0.835 $\pm$ 0.038<br>(0.762-0.909; p <0.001) | 0.656 $\pm$ 0.051<br>(0.557-0.756; p = 0.002)  | 0.598 $\pm$ 0.053<br>(0.494-0.703; p = 0.063) | 0.635 $\pm$ 0.045<br>(0.546-0.723; p = 0.004) |
| cfDNA<br>(ng/ $\mu$ L)     | 0.639 $\pm$ 0.047<br>(0.546-0.731; p = 0.009) | 0.819 $\pm$ 0.045<br>(0.730-0.907; p <0.001) | 0.622 $\pm$ 0.052<br>(0.520-0.725; p = 0.017)  | 0.608 $\pm$ 0.053<br>(0.503-0.712; p = 0.042) | 0.600 $\pm$ 0.046<br>(0.510-0.690; p = 0.034) |
| cfAFP DNA<br>(vs. RPP30)   | 0.441 $\pm$ 0.056<br>(0.332-0.550; p = 0.268) | 0.51 $\pm$ 0.054<br>(0.405-0.616; p =0.876)  | 0.462 $\pm$ 0.053<br>(0.358-0.567; p = 0.461)  | 0.56 $\pm$ 0.047<br>(0.468-0.651; p = 0.259)  | 0.476 $\pm$ 0.047<br>(0.384-0.568; p = 0.608) |
| Total Protein<br>(g/dL)    | 0.385 $\pm$ 0.052<br>(0.282-0.487; p = 0.031) | 0.582 $\pm$ 0.069<br>(0.447-0.718; p =0.201) | 0.366 $\pm$ 0.052<br>(0.264-0.468; p = 0.009)  | 0.579 $\pm$ 0.053<br>(0.474-0.684; p = 0.135) | 0.391 $\pm$ 0.046<br>(0.302-0.481; p = 0.021) |
| Serum AFP<br>(ng/mL)       | 0.565 $\pm$ 0.050<br>(0.467-0.663; p = 0.224) | 0.649 $\pm$ 0.066<br>(0.519-0.779; p =0.021) | 0.542 $\pm$ 0.055<br>(0.435-0.649; p = 0.411)  | 0.538 $\pm$ 0.052<br>(0.437-0.640; p = 0.468) | 0.600 $\pm$ 0.046<br>(0.51-0.69; p = 0.033)   |
| Serum AST<br>(IU/L)        | 0.587 $\pm$ 0.052<br>(0.485-0.688; p = 0.104) | 0.588 $\pm$ 0.06<br>(0.471-0.705; p =0.173)  | 0.621 $\pm$ 0.049<br>(0.525-0.717; p = 0.018)  | 0.534 $\pm$ 0.049<br>(0.437-0.630; p = 0.525) | 0.624 $\pm$ 0.046<br>(0.533-0.714; p = 0.008) |
| Serum ALT<br>(IU/L)        | 0.580 $\pm$ 0.052<br>(0.477-0.682; p = 0.136) | 0.526 $\pm$ 0.065<br>(0.398-0.653; p =0.692) | 0.658 $\pm$ 0.049<br>(0.563-0.753; p = 0.002)  | 0.425 $\pm$ 0.049<br>(0.330-0.521; p = 0.159) | 0.622 $\pm$ 0.046<br>(0.533-0.712; p = 0.009) |
| Serum Albumin<br>(g/dL)    | 0.455 $\pm$ 0.057<br>(0.342-0.568; p = 0.399) | 0.437 $\pm$ 0.061<br>(0.318-0.556; p =0.329) | 0.393 $\pm$ 0.0540<br>(0.288-0.498; p = 0.037) | 0.449 $\pm$ 0.052<br>(0.348-0.551; p = 0.339) | 0.413 $\pm$ 0.046<br>(0.322-0.503; p = 0.064) |
| Serum ALP<br>(IU/L)        | 0.479 $\pm$ 0.050<br>(0.381-0.578; p = 0.699) | 0.743 $\pm$ 0.067<br>(0.611-0.875; p <0.001) | 0.445 $\pm$ 0.055<br>(0.336-0.553; p = 0.281)  | 0.696 $\pm$ 0.051<br>(0.596-0.797; p <0.001)  | 0.478 $\pm$ 0.047<br>(0.385-0.571; p = 0.642) |
| Serum Bilirubin<br>(mg/dL) | 0.451 $\pm$ 0.051<br>(0.352-0.551; p = 0.363) | 0.531 $\pm$ 0.066<br>(0.401-0.660; p =0.635) | 0.525 $\pm$ 0.054<br>(0.419-0.631; p = 0.629)  | 0.548 $\pm$ 0.055<br>(0.441-0.655; p = 0.368) | 0.491 $\pm$ 0.047<br>(0.399-0.583; p = 0.848) |

\* UICC: The cancer stage defined by union for international cancer control; VI: Vascular invasion; Tumor N: Number of tumors.

**Supplementary Table S8.** Diagnostic performance of serum enzymes, plasma cfDNA, and cfAFP DNA for determining the pathological features of HCC patients (Threshold: median expression level of each biomarker).

|                 | <i>UICC <math>\geq 2</math></i> |             |          |       |       | <i>UICC <math>\geq 3</math></i> |             |          |       |       |
|-----------------|---------------------------------|-------------|----------|-------|-------|---------------------------------|-------------|----------|-------|-------|
|                 | Sensitivity                     | Specificity | Accuracy | PPV   | NPV   | Sensitivity                     | Specificity | Accuracy | PPV   | NPV   |
| cfDHCC          | 0.580                           | 0.725       | 0.618    | 0.855 | 0.382 | 0.917                           | 0.578       | 0.632    | 0.289 | 0.974 |
| cfDNA           | 0.563                           | 0.650       | 0.586    | 0.818 | 0.347 | 0.917                           | 0.570       | 0.625    | 0.286 | 0.973 |
| cfAFP DNA       | 0.482                           | 0.450       | 0.474    | 0.711 | 0.237 | 0.500                           | 0.500       | 0.500    | 0.158 | 0.842 |
| Total Protein   | 0.500                           | 0.350       | 0.461    | 0.683 | 0.200 | 0.625                           | 0.477       | 0.500    | 0.183 | 0.871 |
| Serum AFP       | 0.527                           | 0.575       | 0.539    | 0.776 | 0.303 | 0.750                           | 0.547       | 0.579    | 0.237 | 0.921 |
| Serum AST       | 0.527                           | 0.575       | 0.539    | 0.776 | 0.303 | 0.625                           | 0.523       | 0.539    | 0.197 | 0.882 |
| Serum ALT       | 0.518                           | 0.550       | 0.526    | 0.763 | 0.289 | 0.542                           | 0.508       | 0.513    | 0.171 | 0.855 |
| Serum Albumin   | 0.527                           | 0.475       | 0.513    | 0.738 | 0.264 | 0.500                           | 0.469       | 0.474    | 0.150 | 0.833 |
| Serum ALP       | 0.491                           | 0.450       | 0.480    | 0.714 | 0.240 | 0.792                           | 0.547       | 0.586    | 0.247 | 0.933 |
| Serum Bilirubin | 0.500                           | 0.400       | 0.474    | 0.700 | 0.222 | 0.542                           | 0.477       | 0.487    | 0.163 | 0.847 |

  

|                 | <i>VI</i>   |             |          |       |       | <i>Tumor Number <math>\geq 2</math></i> |             |          |       |       |
|-----------------|-------------|-------------|----------|-------|-------|-----------------------------------------|-------------|----------|-------|-------|
|                 | Sensitivity | Specificity | Accuracy | PPV   | NPV   | Sensitivity                             | Specificity | Accuracy | PPV   | NPV   |
| cfDHCC          | 0.652       | 0.566       | 0.592    | 0.395 | 0.789 | 0.634                                   | 0.550       | 0.572    | 0.342 | 0.803 |
| cfDNA           | 0.609       | 0.538       | 0.559    | 0.364 | 0.760 | 0.634                                   | 0.541       | 0.566    | 0.338 | 0.800 |
| cfAFP DNA       | 0.478       | 0.491       | 0.487    | 0.289 | 0.684 | 0.610                                   | 0.541       | 0.559    | 0.329 | 0.789 |
| Total Protein   | 0.413       | 0.406       | 0.408    | 0.232 | 0.614 | 0.561                                   | 0.468       | 0.493    | 0.280 | 0.743 |
| Serum AFP       | 0.565       | 0.528       | 0.539    | 0.342 | 0.737 | 0.561                                   | 0.523       | 0.533    | 0.303 | 0.763 |
| Serum AST       | 0.674       | 0.575       | 0.605    | 0.408 | 0.803 | 0.488                                   | 0.495       | 0.493    | 0.263 | 0.724 |
| Serum ALT       | 0.696       | 0.585       | 0.618    | 0.421 | 0.816 | 0.366                                   | 0.450       | 0.428    | 0.197 | 0.658 |
| Serum Albumin   | 0.435       | 0.434       | 0.434    | 0.250 | 0.639 | 0.463                                   | 0.450       | 0.454    | 0.238 | 0.694 |
| Serum ALP       | 0.478       | 0.481       | 0.480    | 0.286 | 0.680 | 0.683                                   | 0.559       | 0.592    | 0.364 | 0.827 |
| Serum Bilirubin | 0.565       | 0.491       | 0.513    | 0.325 | 0.722 | 0.537                                   | 0.477       | 0.493    | 0.275 | 0.736 |

|                 | <i>Tumor Diameter <math>\geq</math> Median</i> |             |          |       |       |
|-----------------|------------------------------------------------|-------------|----------|-------|-------|
|                 | Sensitivity                                    | Specificity | Accuracy | PPV   | NPV   |
| cfDHCC          | 0.608                                          | 0.616       | 0.612    | 0.632 | 0.592 |
| cfDNA           | 0.570                                          | 0.562       | 0.566    | 0.584 | 0.547 |
| cfAFP DNA       | 0.481                                          | 0.479       | 0.480    | 0.500 | 0.461 |
| Total Protein   | 0.494                                          | 0.411       | 0.454    | 0.476 | 0.429 |
| Serum AFP       | 0.570                                          | 0.575       | 0.572    | 0.592 | 0.553 |
| Serum AST       | 0.608                                          | 0.616       | 0.612    | 0.632 | 0.592 |
| Serum ALT       | 0.595                                          | 0.603       | 0.599    | 0.618 | 0.579 |
| Serum Albumin   | 0.494                                          | 0.438       | 0.467    | 0.488 | 0.444 |
| Serum ALP       | 0.468                                          | 0.452       | 0.461    | 0.481 | 0.440 |
| Serum Bilirubin | 0.519                                          | 0.466       | 0.493    | 0.513 | 0.472 |

**Supplementary Table S9.** Odd ratio of serum enzymes, plasma cfDNA, and cfAFP DNA for determining the pathological features of HCC patients (Threshold: median expression level of each biomarker).

|                       | cfD <sub>HCC</sub> Score              | cfDNA                                 | cfAFP DNA                           | Total Protein                       | AFP                                 | AST                                 | ALT                                 | Albumin                             | ALP                                  | Bilirubin                           |
|-----------------------|---------------------------------------|---------------------------------------|-------------------------------------|-------------------------------------|-------------------------------------|-------------------------------------|-------------------------------------|-------------------------------------|--------------------------------------|-------------------------------------|
| UICC $\geq 2$         | 3.646<br>(1.656-8.026)<br>p = 0.002   | 2.388<br>(1.129-5.052)<br>p = 0.027   | 0.762<br>(0.369-1.573)<br>p = 0.581 | 0.538<br>(0.255-1.138)<br>p = 0.139 | 1.506<br>(0.727-3.120)<br>p = 0.357 | 1.506<br>(0.727-3.120)<br>p = 0.357 | 1.313<br>(0.636-2.710)<br>p = 0.581 | 1.007<br>(0.489-2.075)<br>p = 1.000 | 0.789<br>(0.382-1.63)<br>p = 0.583   | 0.667<br>(0.32-1.388)<br>p = 0.357  |
| UICC $\geq 3$         | 15.074<br>(3.399-66.847)<br>p < 0.001 | 14.600<br>(3.293-64.732)<br>p < 0.001 | 1.000<br>(0.418-2.392)<br>p = 1.000 | 1.517<br>(0.619-3.718)<br>p = 0.383 | 3.621<br>(1.349-9.718)<br>p = 0.013 | 1.831<br>(0.747-4.486)<br>p = 0.266 | 1.219<br>(0.509-2.924)<br>p = 0.824 | 0.882<br>(0.369-2.111)<br>p = 0.826 | 4.586<br>(1.613-13.038)<br>p = 0.003 | 1.076<br>(0.449-2.58)<br>p = 1.000  |
| VI                    | 2.446<br>(1.193-5.015)<br>p = 0.021   | 1.810<br>(0.894-3.661)<br>p = 0.114   | 0.883<br>(0.442-1.764)<br>p = 0.860 | 0.480<br>(0.238-0.971)<br>p = 0.051 | 1.456<br>(0.725-2.922)<br>p = 0.377 | 2.801<br>(1.354-5.795)<br>p = 0.008 | 3.221<br>(1.541-6.733)<br>p = 0.002 | 0.590<br>(0.293-1.185)<br>p = 0.159 | 0.850<br>(0.425-1.699)<br>p = 0.725  | 1.252<br>(0.624-2.512)<br>p = 0.597 |
| Tumor Number $\geq 2$ | 2.115<br>(1.012-4.42)<br>p = 0.067    | 2.039<br>(0.976-4.261)<br>p = 0.068   | 1.838<br>(0.886-3.815)<br>p = 0.143 | 1.126<br>(0.548-2.315)<br>p = 0.855 | 1.398<br>(0.68-2.874)<br>p = 0.465  | 0.935<br>(0.457-1.915)<br>p = 1.000 | 0.473<br>(0.226-0.988)<br>p = 0.067 | 0.708<br>(0.345-1.453)<br>p = 0.366 | 2.725<br>(1.278-5.81)<br>p = 0.010   | 1.058<br>(0.516-2.169)<br>p = 1.000 |
| Tumor D $\geq$ Median | 2.488<br>(1.295-4.781)<br>p = 0.009   | 1.696<br>(0.892-3.222)<br>p = 0.144   | 0.854<br>(0.452-1.614)<br>p = 0.746 | 0.680<br>(0.358-1.292)<br>p = 0.258 | 1.793<br>(0.942-3.412)<br>p = 0.104 | 2.488<br>(1.295-4.781)<br>p = 0.009 | 2.228<br>(1.164-4.266)<br>p = 0.023 | 0.761<br>(0.402-1.442)<br>p = 0.421 | 0.727<br>(0.384-1.376)<br>p = 0.336  | 0.941<br>(0.497-1.779)<br>p = 0.872 |

\* Odd ratio (95%CI)

**Supplementary Table S10.** Kaplan-Meier survival analysis for RFS of TACE-treated patients.

| Biomarkers                     | Cut-off                           |                                   |         |                                   |                                   |         |                                   |                                   |         |
|--------------------------------|-----------------------------------|-----------------------------------|---------|-----------------------------------|-----------------------------------|---------|-----------------------------------|-----------------------------------|---------|
|                                | Q1                                |                                   |         | Median                            |                                   |         | Q3                                |                                   |         |
|                                | ≥ Q1                              | < Q1                              | P-Value | ≥ Q2                              | < Q2                              | P-Value | ≥ Q3                              | < Q3                              | P-Value |
| <b>cfD<sub>HCC</sub> Score</b> | 21.473 ± 3.833<br>(13.862-29.084) | 19.500 ± 6.223<br>(7.303-31.697)  | 0.796   | 15.905 ± 3.988<br>(8.089-23.721)  | 26.489 ± 5.221<br>(16.256-36.721) | 0.061   | 11.636 ± 4.886<br>(2.059-21.214)  | 24.559 ± 4.035<br>(16.651-32.467) | 0.034   |
| <b>cfDNA</b>                   | 22.634 ± 3.908<br>(14.975-30.292) | 12.667 ± 3.307<br>(6.184-19.149)  | 0.348   | 16.524 ± 3.970<br>(8.742-24.305)  | 25.958 ± 5.237<br>(15.695-36.222) | 0.153   | 16.273 ± 6.188<br>(4.144-28.401)  | 22.843 ± 3.969<br>(15.065-30.622) | 0.201   |
| <b>cfAFP DNA</b>               | 22.965 ± 4.127<br>(14.876-31.053) | 15.700 ± 4.847<br>(6.201-25.199)  | 0.239   | 26.578 ± 5.183<br>(16.420-36.736) | 13.794 ± 3.089<br>(7.741-19.848)  | 0.051   | 22.100 ± 6.294<br>(9.764-34.436)  | 20.764 ± 4.002<br>(12.921-28.608) | 0.994   |
| <b>Total Protein</b>           | 18.566 ± 3.191<br>(12.312-24.820) | 31.875 ± 9.636<br>(12.988-50.762) | 0.179   | 20.217 ± 3.796<br>(12.777-27.658) | 22.859 ± 5.850<br>(11.392-34.325) | 0.482   | 13.083 ± 2.080<br>(9.007-17.160)  | 24.619 ± 4.501<br>(15.797-33.440) | 0.189   |
| <b>AFP</b>                     | 14.545 ± 3.808<br>(7.082-22.009)  | 20.701 ± 3.919<br>(14.019-29.382) | 0.628   | 17.190 ± 3.966<br>(9.417-24.964)  | 25.103 ± 5.332<br>(14.654-35.553) | 0.150   | 17.868 ± 3.446<br>(11.113-24.623) | 27.545 ± 6.989<br>(13.847-41.244) | 0.200   |
| <b>AST</b>                     | 19.144 ± 3.791<br>(11.713-26.575) | 27.644 ± 6.774<br>(14.367-40.922) | 0.471   | 20.955 ± 4.981<br>(11.191-30.718) | 20.754 ± 4.292<br>(12.342-29.167) | 0.886   | 13.955 ± 5.815<br>(2.558-25.351)  | 23.476 ± 3.971<br>(15.693-31.260) | 0.092   |
| <b>ALT</b>                     | 22.171 ± 3.889<br>(14.549-20.794) | 16.625 ± 6.158<br>(4.554-28.696)  | 0.308   | 21.216 ± 4.866<br>(11.679-30.753) | 21.070 ± 4.617<br>(12.021-30.119) | 0.917   | 22.145 ± 6.298<br>(9.802-34.489)  | 20.422 ± 3.859<br>(12.879-28.006) | 0.715   |
| <b>Albumin</b>                 | 22.384 ± 3.655<br>(15.220-29.548) | 15.611 ± 7.613<br>(0.690-30.531)  | 0.391   | 20.704 ± 3.872<br>(13.115-28.293) | 21.363 ± 5.776<br>(10.042-32.684) | 0.813   | 22.667 ± 5.662<br>(11.648-33.685) | 20.266 ± 4.026<br>(12.375-28.158) | 0.654   |
| <b>ALP</b>                     | 21.256 ± 3.817<br>(13.775-28.737) | 18.100 ± 6.661<br>(5.044-31.156)  | 0.737   | 20.557 ± 4.472<br>(11.791-29.322) | 21.012 ± 4.835<br>(11.535-30.489) | 0.898   | 18.273 ± 6.288<br>(5.948-30.597)  | 21.727 ± 3.820<br>(14.239-29.215) | 0.876   |
| <b>Bilirubin</b>               | 17.065 ± 3.618<br>(9.973-24.156)  | 33.067 ± 6.402<br>(20.519-45.615) | 0.064   | 17.273 ± 4.179<br>(9.083-25.463)  | 25.090 ± 5.053<br>(15.185-34.994) | 0.276   | 13.364 ± 4.941<br>(3.678-23.049)  | 23.694 ± 3.992<br>(15.869-31.518) | 0.196   |

\* Survival duration ± S.D. (95% CI)

\*\* Units: Months

**Supplementary Table S11.** Kaplan-Meier survival analysis for marginal recurrence of TACE-treated patients.

| Biomarkers                     | Cut-off                           |                                    |         |                                   |                                   |         |                                    |                                   |         |
|--------------------------------|-----------------------------------|------------------------------------|---------|-----------------------------------|-----------------------------------|---------|------------------------------------|-----------------------------------|---------|
|                                | Q1                                |                                    |         | Median                            |                                   |         | Q3                                 |                                   |         |
|                                | ≥ Q1                              | < Q1                               | P-Value | ≥ Q2                              | < Q2                              | P-Value | ≥ Q3                               | < Q3                              | P-Value |
| <b>cfD<sub>HCC</sub> Score</b> | 33.247 ± 5.141<br>(23.171-43.323) | 36.167 ± 9.884<br>(16.794-55.539)  | 0.483   | 27.379 ± 6.314<br>(15.003-39.755) | 41.146 ± 6.333<br>(28.733-53.559) | 0.061   | 30.222 ± 10.775<br>(9.104-51.341)  | 36.360 ± 5.138<br>(26.288-46.43)  | 0.228   |
| <b>cfDNA</b>                   | 35.887 ± 5.125<br>(25.842-45.933) | 19.400 ± 4.377<br>(10.822-27.978)  | 0.592   | 27.947 ± 6.198<br>(15.799-40.096) | 41.256 ± 6.389<br>(28.734-53.777) | 0.121   | 37.222 ± 10.493<br>(16.656-57.788) | 34.128 ± 5.191<br>(23.954-44.302) | 0.866   |
| <b>cfAFP DNA</b>               | 34.957 ± 5.246<br>(24.675-45.239) | 27.238 ± 6.994<br>(13.529-40.947)  | 0.907   | 41.597 ± 6.065<br>(29.709-53.484) | 20.387 ± 4.632<br>(11.308-29.466) | 0.094   | 43.571 ± 9.832<br>(24.301-62.842)  | 30.692 ± 5.314<br>(20.278-41.107) | 0.327   |
| <b>Total Protein</b>           | 31.349 ± 5.049<br>(21.453-41.244) | 51.143 ± 7.375<br>(36.689-65.597)  | 0.256   | 31.282 ± 5.624<br>(20.259-42.306) | 41.480 ± 7.300<br>(27.172-55.788) | 0.406   | 15.295 ± 2.437<br>(10.519-20.071)  | 41.081 ± 5.389<br>(30.519-51.644) | 0.066   |
| <b>AFP</b>                     | 17.000 ± 4.308<br>(8.556-25.444)  | 35.610 ± 5.498<br>(24.834-46.386)  | 0.250   | 61.164 ± 5.384<br>(15.612-36.716) | 41.823 ± 6.465<br>(29.151-54.494) | 0.091   | 29.049 ± 4.814<br>(19.614-38.483)  | 41.804 ± 8.299<br>(25.538-58.070) | 0.252   |
| <b>AST</b>                     | 31.080 ± 5.394<br>(20.508-41.653) | 45.086 ± 8.672<br>(28.088-62.083)  | 0.250   | 29.809 ± 6.484<br>(17.100-42.518) | 37.487 ± 6.547<br>(24.655-50.318) | 0.417   | 30.010 ± 8.956<br>(12.456-47.564)  | 35.717 ± 5.037<br>(25.846-45.589) | 0.455   |
| <b>ALT</b>                     | 34.705 ± 5.072<br>(24.765-44.646) | 30.786 ± 8.514<br>(14.098-47.474)  | 0.993   | 26.943 ± 5.991<br>(15.200-38.685) | 43.085 ± 6.512<br>(30.321-55.848) | 0.092   | 24.809 ± 7.181<br>(10.735-38.884)  | 38.897 ± 5.370<br>(28.371-49.422) | 0.262   |
| <b>Albumin</b>                 | 34.746 ± 4.876<br>(25.188-44.304) | 34.686 ± 11.024<br>(13.078-56.294) | 0.754   | 35.715 ± 5.842<br>(23.724-46.626) | 34.034 ± 7.364<br>(19.601-48.467) | 0.721   | 33.000 ± 7.739<br>(17.831-48.169)  | 35.492 ± 5.593<br>(24.535-46.459) | 0.949   |
| <b>ALP</b>                     | 35.274 ± 5.172<br>(2.138-45.411)  | 29.473 ± 8.641<br>(12.537-46.409)  | 0.833   | 30.133 ± 5.843<br>(18.681-41.585) | 39.825 ± 7.266<br>(25.584-54.067) | 0.167   | 28.091 ± 8.497<br>(11.437-44.745)  | 37.253 ± 5.247<br>(26.968-47.538) | 0.272   |
| <b>Bilirubin</b>               | 30.526 ± 4.574<br>(19.287-41.765) | 44.482 ± 6.898<br>(30.965-57.998)  | 0.168   | 30.251 ± 6.629<br>(17.259-43.242) | 38.150 ± 6.156<br>(26.084-50.216) | 0.536   | 24.190 ± 4.574<br>(25.299-43.227)  | 36.914 ± 5.101<br>(26.916-46.913) | 0.382   |

\* Survival duration ± S.D. (95% CI)

\*\* Units: Months



**Supplementary Table S12.** Kaplan-Meier survival analysis for multifocal recurrence of TACE-treated patients.

| Biomarkers                     | Cut-off                           |                                    |         |                                   |                                   |         |                                    |                                   |         |
|--------------------------------|-----------------------------------|------------------------------------|---------|-----------------------------------|-----------------------------------|---------|------------------------------------|-----------------------------------|---------|
|                                | Q1                                |                                    |         | Median                            |                                   |         | Q3                                 |                                   |         |
|                                | ≥ Q1                              | < Q1                               | P-Value | ≥ Q2                              | < Q2                              | P-Value | ≥ Q3                               | < Q3                              | P-Value |
| <b>cfD<sub>HCC</sub> Score</b> | 34.087 ± 5.230<br>(23.837-44.338) | 44.167 ± 9.725<br>(25.105-63.228)  | 0.304   | 23.219 ± 5.512<br>(12.416-34.022) | 54.015 ± 4.591<br>(45.018-63.013) | 0.001   | 22.616 ± 9.369<br>(4.254-40.980)   | 41.531 ± 5.167<br>(31.404-51.658) | 0.034   |
| <b>cfDNA</b>                   | 36.852 ± 5.194<br>(26.671-47.033) | 21.500 ± 4.920<br>(11.856-31.144)  | 0.835   | 26.784 ± 5.920<br>(15.181-38.387) | 48.284 ± 5.604<br>(37.301-59.267) | 0.043   | 30.596 ± 10.096<br>(10.807-50.385) | 39.227 ± 5.331<br>(28.779-49.675) | 0.318   |
| <b>cfAFP DNA</b>               | 35.999 ± 5.337<br>(25.538-46.460) | 34.171 ± 7.920<br>(18.648-49.694)  | 0.897   | 35.063 ± 5.939<br>(23.423-26.703) | 32.097 ± 6.938<br>(18.498-45.695) | 0.749   | 33.857 ± 8.770<br>(16.668-51.046)  | 38.600 ± 5.625<br>(27.575-49.625) | 0.743   |
| <b>Total Protein</b>           | 33.725 ± 5.298<br>(23.341-44.109) | 51.143 ± 7.375<br>(36.689-65.597)  | 0.330   | 32.938 ± 5.828<br>(21.515-44.361) | 45.326 ± 6.059<br>(33.450-57.202) | 0.595   | 17.861 ± 2.715<br>(12.540-23.182)  | 44.239 ± 5.083<br>(34.277-54.202) | 0.070   |
| <b>AFP</b>                     | 18.500 ± 4.223<br>(10.223-26.777) | 40.259 ± 5.591<br>(29.300-51.218)  | 0.147   | 29.755 ± 5.759<br>(18.467-41.044) | 41.196 ± 6.829<br>(27.811-54.581) | 0.218   | 31.772 ± 5.040<br>(21.893-41.650)  | 42.039 ± 8.296<br>(25.780-58.298) | 0.364   |
| <b>AST</b>                     | 35.271 ± 5.802<br>(23.898-46.643) | 39.794 ± 8.999<br>(22.155-57.432)  | 0.776   | 40.519 ± 6.989<br>(26.820-54.218) | 32.627 ± 6.313<br>(20.254-45.000) | 0.439   | 37.255 ± 8.423<br>(20.745-53.765)  | 39.946 ± 5.123<br>(26.906-46.986) | 0.801   |
| <b>ALT</b>                     | 37.221 ± 5.277<br>(26.878-47.563) | 30.786 ± 8.514<br>(14.098-47.474)  | 0.798   | 36.302 ± 6.791<br>(22.992-49.612) | 37.407 ± 6.464<br>(24.739-50.076) | 0.822   | 37.716 ± 9.105<br>(19.870-55.562)  | 36.356 ± 5.403<br>(25.767-46.946) | 0.887   |
| <b>Albumin</b>                 | 37.267 ± 5.007<br>(27.454-47.081) | 34.686 ± 11.024<br>(13.078-56.294) | 0.639   | 35.024 ± 5.989<br>(23.286-46.763) | 39.965 ± 7.004<br>(26.236-53.693) | 0.892   | 35.018 ± 8.150<br>(19.045-50.992)  | 37.388 ± 5.678<br>(26.259-48.517) | 0.996   |
| <b>ALP</b>                     | 42.538 ± 5.076<br>(32.589-52.487) | 20.000 ± 6.627<br>(7.011-32.989)   | 0.0.053 | 38.113 ± 6.125<br>(26.109-50.117) | 35.935 ± 7.020<br>(22.076-49.593) | 0.910   | 30.768 ± 9.010<br>(13.109-48.427)  | 38.624 ± 5.394<br>(28.052-49.197) | 0.440   |
| <b>Bilirubin</b>               | 31.216 ± 4.690<br>(27.335-45.720) | 48.741 ± 6.402<br>(36.192-61.289)  | 0.121   | 33.008 ± 7.085<br>(19.122-46.895) | 39.652 ± 6.284<br>(27.336-51.968) | 0.560   | 36.351 ± 9.453<br>(17.822-54.879)  | 37.276 ± 5.182<br>(27.118-47.433) | 0.594   |

\* Survival duration ± S.D. (95% CI)

\*\* Units: Months

**Supplementary Table S13.** Kaplan-Meier survival analysis for OS of TACE-treated patients.

| Biomarkers                     | Cut-off                            |                                   |         |                                    |                                   |         |                                   |                                   |         |
|--------------------------------|------------------------------------|-----------------------------------|---------|------------------------------------|-----------------------------------|---------|-----------------------------------|-----------------------------------|---------|
|                                | Q1                                 |                                   |         | Median                             |                                   |         | Q3                                |                                   |         |
|                                | ≥ Q1                               | < Q1                              | P-Value | ≥ Q2                               | < Q2                              | P-Value | ≥ Q3                              | < Q3                              | P-Value |
| <b>cfD<sub>HCC</sub> Score</b> | 51.898 ± 4.400<br>(43.274-60.521)  | 68.300 ± 5.407<br>(57.701-78.899) | 0.178   | 47.707 ± 35.593<br>(36.744-58.669) | 65.665 ± 4.407<br>(57.027-74.303) | 0.077   | 45.600 ± 8.690<br>(28.567-62.633) | 61.098 ± 4.201<br>(52.865-69.332) | 0.131   |
| <b>cfDNA</b>                   | 54.227 ± 4.146<br>(46.101-62.352)  | 61.587 ± 7.819<br>(46.262-76.262) | 0.759   | 49.303 ± 5.241<br>(39.031-59.575)  | 64.685 ± 4.926<br>(55.030-74.341) | 0.142   | 51.000 ± 8.224<br>(34.880-67.120) | 58.955 ± 4.475<br>(50.185-67.726) | 0.647   |
| <b>cfAFP DNA</b>               | 58.348 ± 4.700<br>(49.136-67.559)  | 53.909 ± 7.289<br>(39.623-68.195) | 0.981   | 58.252 ± 5.465<br>(47.540-68.964)  | 53.735 ± 5.706<br>(42.552-64.918) | 0.870   | 62.424 ± 7.379<br>(47.961-76.887) | 52.789 ± 4.426<br>(44.115-61.464) | 0.430   |
| <b>Total Protein</b>           | 57.969 ± 4.468<br>(49.212-66.726)  | 54.698 ± 8.249<br>(38.530-70.867) | 0.989   | 59.110 ± 5.092<br>(49.129-69.090)  | 53.681 ± 5.850<br>(42.215-65.147) | 0.788   | 56.241 ± 7.101<br>(42.323-70.159) | 55.662 ± 4.375<br>(47.087-64.236) | 0.693   |
| <b>AFP</b>                     | 32.700 ± 5.376<br>(22.163-43.237)  | 62.543 ± 4.164<br>(54.383-70.704) | 0.032   | 48.680 ± 5.655<br>(37.640-59.720)  | 65.782 ± 4.410<br>(57.139-74.425) | 0.084   | 55.327 ± 5.128<br>(45.276-65.379) | 62.095 ± 3.962<br>(54.332-69.859) | 0.277   |
| <b>AST</b>                     | 56.043 ± 4.703<br>(46.825-65.262;) | 60.800 ± 6.440<br>(48.178-73.422) | 0.323   | 50.860 ± 5.116<br>(40.833-60.886)  | 64.039 ± 5.246<br>(53.758-74.321) | 0.212   | 53.800 ± 7.378<br>(39.339-68.261) | 58.612 ± 4.618<br>(49.561-67.663) | 0.837   |
| <b>ALT</b>                     | 57.675 ± 4.560<br>(48.738-66.613)  | 48.700 ± 6.957<br>(35.065-62.335) | 0.856   | 49.104 ± 5.616<br>(38.097-60.111)  | 63.121 ± 4.954<br>(53.419-72.840) | 0.223   | 48.500 ± 6.535<br>(35.692-61.308) | 58.924 ± 4.545<br>(50.015-67.833) | 0.723   |
| <b>Albumin</b>                 | 61.230 ± 4.197<br>(53.003-69.457)  | 43.557 ± 9.281<br>(25.367-61.747) | 0.108   | 61.730 ± 4.772<br>(52.378-71.082)  | 50.134 ± 6.192<br>(37.997-62.271) | 0.299   | 50.800 ± 5.606<br>(39.812-61.788) | 59.480 ± 4.751<br>(50.167-68.793) | 0.633   |
| <b>ALP</b>                     | 57.434 ± 4.657<br>(48.306-66.561)  | 52.943 ± 6.532<br>(40.140-65.745) | 0.729   | 49.395 ± 5.264<br>(39.077-59.712)  | 64.068 ± 5.166<br>(53.943-74.194) | 0.152   | 49.986 ± 8.026<br>(31.255-62.717) | 60.693 ± 4.372<br>(52.124-69.263) | 0.257   |
| <b>Bilirubin</b>               | N/A (All Cases Censored)           |                                   |         | 50.132 ± 5.262<br>(39.819-60.445)  | 64.187 ± 5.173<br>(54.048-74.325) | 0.170   | 42.727 ± 7.653<br>(27.728-57.727) | 63.807 ± 4.097<br>(55.777-71.836) | 0.016   |

\* Survival duration ± S.D. (95% CI)

\*\* Units: Months

**Supplementary Table S14.** Univariate Cox regression analysis of the serum and plasma biomarkers for TACE-treated patients.

|                       |                 |                                      | Cut-off                              | cfD <sub>HCC</sub> Score             | cfDNA                               | cfAFP DNA                            | Total Protein                        | AFP                                  | AST                                  | ALT                                 | Albumin                              | ALP                                   | Bilirubin                           |
|-----------------------|-----------------|--------------------------------------|--------------------------------------|--------------------------------------|-------------------------------------|--------------------------------------|--------------------------------------|--------------------------------------|--------------------------------------|-------------------------------------|--------------------------------------|---------------------------------------|-------------------------------------|
| Recurrence            | Non-categorical |                                      | 1.569<br>(1.201–2.048)<br>P = 0.001  | 1.111<br>(1.024–1.206)<br>P = 0.011  | 0.954<br>(0.871–1.045)<br>P = 0.314 | 1.224<br>(0.822–1.823)<br>P = 0.319  | 1.000<br>(1.000–1.000)<br>P = 0.017  | 1.006<br>(0.997–1.015)<br>P = 0.187  | 0.994<br>(0.977–1.011)<br>P = 0.495  | 0.924<br>(0.441–1.936)<br>P = 0.834 | 1.002<br>(0.998–1.005)<br>P = 0.370  | 1.076<br>(0.810–1.430)<br>P = 0.370   |                                     |
|                       | Categorical     | Q1                                   | 0.907<br>(0.423–1.946)<br>P = 0.801  | 0.689<br>(0.308–1.546)<br>P = 0.367  | 0.648<br>(0.305–1.373)<br>P = 0.257 | 1.912<br>(0.715–5.116)<br>P = 0.197  | 1.206<br>(0.551–2.637)<br>P = 0.639  | 1.330<br>(0.598–2.956)<br>P = 0.485  | 0.668<br>(0.299–1.492)<br>P = 0.325  | 0.700<br>(0.301–1.628)<br>P = 0.407 | 0.875<br>(0.392–1.955)<br>P = 0.745  | 2.072<br>(0.924–4.645)<br>P = 0.745   |                                     |
|                       |                 | Med                                  | 1.875<br>(0.943–3.728)<br>P = 0.073  | 1.619<br>(0.814–3.222)<br>P = 0.169  | 0.502<br>(0.243–1.038)<br>P = 0.063 | 0.998<br>(0.497–2.004)<br>P = 0.995  | 1.642<br>(0.813–3.319)<br>P = 0.167  | 0.953<br>(0.482–1.883)<br>P = 0.889  | 0.966<br>(0.489–1.905)<br>P = 0.920  | 0.921<br>(0.458–1.855)<br>P = 0.819 | 1.044<br>(0.529–2.059)<br>P = 0.901  | 1.443<br>(0.729–2.857)<br>P = 0.901   |                                     |
|                       |                 | Q3                                   | 2.115<br>(1.021–4.381)<br>P = 0.044  | 1.577<br>(0.765–3.251)<br>P = 0.217  | 1.003<br>(0.478–2.105)<br>P = 0.994 | 1.610<br>(0.767–3.381)<br>P = 0.208  | 1.662<br>(0.74–3.73)<br>P = 0.218    | 1.877<br>(0.871–4.045)<br>P = 0.108  | 0.871 (0.405–<br>1.871) P =<br>0.723 | 0.848<br>(0.404–1.781)<br>P = 0.663 | 1.061<br>(0.492–2.292)<br>P = 0.879  | 1.605<br>(0.762–3.384)<br>P = 0.879   |                                     |
|                       |                 | Non-categorical                      |                                      | 1.477<br>(0.974–2.240)<br>P = 0.066  | 1.058<br>(0.901–1.242)<br>P = 0.492 | 0.903<br>(0.779–1.047)<br>P = 0.175  | 1.883<br>(0.85–4.17)<br>P = 0.119    | 1.000<br>(1.000–1.000)<br>P = 0.033  | 1.004<br>(0.99–1.017)<br>P = 0.588   | 1.007<br>(0.987–1.027)<br>P = 0.489 | 1.036<br>(0.366–2.932)<br>P = 0.947  | 1.001<br>(0.996–1.006)<br>P = 0.571   | 1.001<br>(0.654–1.532)<br>P = 0.571 |
|                       | Categorical     | Q1                                   | 1.542<br>(0.443–5.374)<br>P = 0.496  | 0.740<br>(0.238–2.297)<br>P = 0.602  | 0.936<br>(0.302–2.905)<br>P = 0.909 | 2.336<br>(0.505–10.812)<br>P = 0.278 | 1.779<br>(0.642–4.927)<br>P = 0.268  | 2.026<br>(0.578–7.108)<br>P = 0.270  | 0.994<br>(0.282–3.503)<br>P = 0.993  | 0.820<br>(0.230–2.922)<br>P = 0.760 | 0.886<br>(0.282–2.784)<br>P = 0.836  | 2.162<br>(0.688–6.793)<br>P = 0.836   |                                     |
| Med                   |                 | 2.471<br>(0.908–6.72)<br>P = 0.076   | 2.128<br>(0.782–5.790)<br>P = 0.139  | 0.435<br>(0.156–1.213)<br>P = 0.112  | 1.543<br>(0.537–4.435)<br>P = 0.421 | 2.380<br>(0.822–6.894)<br>P = 0.110  | 1.479<br>(0.558–3.918)<br>P = 0.431  | 2.366<br>(0.824–6.791)<br>P = 0.109  | 0.840<br>(0.315–2.237)<br>P = 0.727  | 2.026<br>(0.712–5.770)<br>P = 0.186 | 1.343<br>(0.514–3.508)<br>P = 0.186  |                                       |                                     |
| Q3                    |                 | 1.874<br>(0.649–5.404)<br>P = 0.245  | 1.100<br>(0.357–3.39)<br>P = 0.868   | 0.548<br>(0.157–1.911)<br>P = 0.345  | 2.419<br>(0.895–6.538)<br>P = 0.082 | 2.017<br>(0.574–7.087)<br>P = 0.274  | 1.539<br>(0.478–4.958)<br>P = 0.470  | 1.707<br>(0.648–4.496)<br>P = 0.279  | 1.032<br>(0.379–2.808)<br>P = 0.951  | 1.726<br>(0.629–4.733)<br>P = 0.289 | 1.576<br>(0.550–4.516)<br>P = 0.289  |                                       |                                     |
| Multifocal Recurrence |                 | Non-categorical                      |                                      | 1.728<br>(1.183–2.525)<br>P = 0.005  | 1.126<br>(0.999–1.268)<br>P = 0.052 | 1.002<br>(0.885–1.134)<br>P = 0.976  | 1.779<br>(0.779–4.061)<br>P = 0.171  | 1.000<br>(1.000–1.000)<br>P = 0.021  | 1.000<br>(0.985–1.016)<br>P = 0.988  | 0.996<br>(0.972–1.022)<br>P = 0.781 | 1.026<br>(0.339–3.108)<br>P = 0.963  | 1.000<br>(0.994–1.006)<br>P = 0.985   | 1.017<br>(0.655–1.578)<br>P = 0.985 |
|                       | Categorical     | Q1                                   | 2.138<br>(0.481–9.493)<br>P = 0.318  | 0.866<br>(0.241–3.118)<br>P = 0.826  | 1.088<br>(0.302–3.918)<br>P = 0.898 | 2.126<br>(0.45–10.037)<br>P = 0.341  | 2.161<br>(0.741–6.304)<br>P = 0.158  | 1.182<br>(0.372–3.752)<br>P = 0.777  | 0.847<br>(0.235–3.048)<br>P = 0.799  | 0.736<br>(0.203–2.677)<br>P = 0.642 | 0.361<br>(0.123–1.065)<br>P = 0.065  | 2.673<br>(0.733–9.741)<br>P = 0.065   |                                     |
|                       |                 | Med                                  | 8.544<br>(1.919–38.042)<br>P = 0.005 | 3.083<br>(0.976–9.742)<br>P = 0.055  | 1.200<br>(0.391–3.686)<br>P = 0.750 | 1.340<br>(0.452–3.975)<br>P = 0.598  | 1.966<br>(0.655–5.903)<br>P = 0.228  | 0.665<br>(0.235–1.888)<br>P = 0.444  | 1.125<br>(0.402–3.149)<br>P = 0.823  | 0.930<br>(0.326–2.654)<br>P = 0.893 | 0.943<br>(0.341–2.613)<br>P = 0.911  | 1.352<br>(0.486–3.76)<br>P = 0.911    |                                     |
|                       |                 | Q3                                   | 2.961<br>(1.032–8.49)<br>P = 0.043   | 1.718<br>(0.584–5.055)<br>P = 0.326  | 1.197<br>(0.406–3.526)<br>P = 0.745 | 2.593<br>(0.887–7.580)<br>P = 0.082  | 1.789<br>(0.498–6.431)<br>P = 0.0373 | 1.183<br>(0.319–4.392)<br>P = 0.802  | 0.921<br>(0.292–2.903)<br>P = 0.888  | 0.997<br>(0.339–2.932)<br>P = 0.996 | 1.526<br>(0.515–4.518)<br>P = 0.445  | 1.366<br>(0.429–4.347)<br>P = 0.445   |                                     |
|                       |                 | Non-categorical                      |                                      | 2.443<br>(1.517–3.932)<br>P < 0.0001 | 1.199<br>(1.057–1.359)<br>P = 0.005 | 0.895<br>(0.735–1.091)<br>P = 0.273  | 1.184<br>(0.589–2.38)<br>P = 0.635   | 1.000<br>(1.000–1.000)<br>P = 0.002  | 1.004<br>(0.991–1.018)<br>P = 0.546  | 1.004<br>(0.974–1.036)<br>P = 0.782 | 0.618<br>(0.183–2.09)<br>P = 0.439   | 1.001<br>(0.996–1.006)<br>P = 0.630   | 1.290<br>(0.813–2.046)<br>P = 0.630 |
|                       | Categorical     | Q1                                   | 3.733<br>(0.476–29.243)<br>P = 0.210 | 1.271<br>(0.274–5.896)<br>P = 0.759  | 0.984<br>(0.26–3.719)<br>P = 0.981  | 1.011<br>(0.218–4.691)<br>P = 0.989  | 3.556<br>(1.028–12.296)<br>P = 0.045 | 2.707<br>(0.346–21.187)<br>P = 0.343 | 1.152<br>(0.248–5.344)<br>P = 0.857  | 0.377<br>(0.109–1.299)<br>P = 0.122 | 1.310<br>(0.283–6.069)<br>P = 0.730  | 36.045<br>(0.156–8336.5)<br>P = 0.730 |                                     |
| Med                   |                 | 3.123<br>(0.826–11.814)<br>P = 0.093 | 2.606<br>(0.691–9.834)<br>P = 0.157  | 0.905<br>(0.274–2.989)<br>P = 0.870  | 0.849<br>(0.258–2.793)<br>P = 0.788 | 3.074<br>(0.806–11.722)<br>P = 0.100 | 2.277<br>(0.603–8.593)<br>P = 0.225  | 2.124<br>(0.615–7.339) P<br>= 0.234  | 0.536<br>(0.162–1.77)<br>P = 0.306   | 2.546<br>(0.675–9.601)<br>P = 0.168 | 2.457<br>(0.651–9.268)<br>P = 0.168  |                                       |                                     |
| Q3                    |                 | 2.503<br>(0.73–8.587)<br>P = 0.145   | 1.363<br>(0.361–5.14)<br>P = 0.648   | 0.544<br>(0.117–2.531)<br>P = 0.437  | 1.281<br>(0.374–4.381)<br>P = 0.694 | 2.300<br>(0.492–10.759)<br>P = 0.290 | 1.150<br>(0.304–4.346)<br>P = 0.837  | 1.273<br>(0.334–4.846)<br>P = 0.723  | 1.314<br>(0.383–4.501)<br>P = 0.664  | 2.011<br>(0.586–6.902)<br>P = 0.267 | 3.912<br>(1.188–12.885)<br>P = 0.267 |                                       |                                     |
| Survival              |                 | Non-categorical                      |                                      | 2.443<br>(1.517–3.932)<br>P < 0.0001 | 1.199<br>(1.057–1.359)<br>P = 0.005 | 0.895<br>(0.735–1.091)<br>P = 0.273  | 1.184<br>(0.589–2.38)<br>P = 0.635   | 1.000<br>(1.000–1.000)<br>P = 0.002  | 1.004<br>(0.991–1.018)<br>P = 0.546  | 1.004<br>(0.974–1.036)<br>P = 0.782 | 0.618<br>(0.183–2.09)<br>P = 0.439   | 1.001<br>(0.996–1.006)<br>P = 0.630   | 1.290<br>(0.813–2.046)<br>P = 0.630 |
|                       | Categorical     | Q1                                   | 3.733<br>(0.476–29.243)<br>P = 0.210 | 1.271<br>(0.274–5.896)<br>P = 0.759  | 0.984<br>(0.26–3.719)<br>P = 0.981  | 1.011<br>(0.218–4.691)<br>P = 0.989  | 3.556<br>(1.028–12.296)<br>P = 0.045 | 2.707<br>(0.346–21.187)<br>P = 0.343 | 1.152<br>(0.248–5.344)<br>P = 0.857  | 0.377<br>(0.109–1.299)<br>P = 0.122 | 1.310<br>(0.283–6.069)<br>P = 0.730  | 36.045<br>(0.156–8336.5)<br>P = 0.730 |                                     |
|                       |                 | Med                                  | 3.123<br>(0.826–11.814)<br>P = 0.093 | 2.606<br>(0.691–9.834)<br>P = 0.157  | 0.905<br>(0.274–2.989)<br>P = 0.870 | 0.849<br>(0.258–2.793)<br>P = 0.788  | 3.074<br>(0.806–11.722)<br>P = 0.100 | 2.277<br>(0.603–8.593)<br>P = 0.225  | 2.124<br>(0.615–7.339) P<br>= 0.234  | 0.536<br>(0.162–1.77)<br>P = 0.306  | 2.546<br>(0.675–9.601)<br>P = 0.168  | 2.457<br>(0.651–9.268)<br>P = 0.168   |                                     |
|                       |                 | Q3                                   | 2.503<br>(0.73–8.587)<br>P = 0.145   | 1.363<br>(0.361–5.14)<br>P = 0.648   | 0.544<br>(0.117–2.531)<br>P = 0.437 | 1.281<br>(0.374–4.381)<br>P = 0.694  | 2.300<br>(0.492–10.759)<br>P = 0.290 | 1.150<br>(0.304–4.346)<br>P = 0.837  | 1.273<br>(0.334–4.846)<br>P = 0.723  | 1.314<br>(0.383–4.501)<br>P = 0.664 | 2.011<br>(0.586–6.902)<br>P = 0.267  | 3.912<br>(1.188–12.885)<br>P = 0.267  |                                     |
|                       |                 | Non-categorical                      |                                      | 2.443<br>(1.517–3.932)<br>P < 0.0001 | 1.199<br>(1.057–1.359)<br>P = 0.005 | 0.895<br>(0.735–1.091)<br>P = 0.273  | 1.184<br>(0.589–2.38)<br>P = 0.635   | 1.000<br>(1.000–1.000)<br>P = 0.002  | 1.004<br>(0.991–1.018)<br>P = 0.546  | 1.004<br>(0.974–1.036)<br>P = 0.782 | 0.618<br>(0.183–2.09)<br>P = 0.439   | 1.001<br>(0.996–1.006)<br>P = 0.630   | 1.290<br>(0.813–2.046)<br>P = 0.630 |
|                       | Non-categorical |                                      | 2.443<br>(1.517–3.932)<br>P < 0.0001 | 1.199<br>(1.057–1.359)<br>P = 0.005  | 0.895<br>(0.735–1.091)<br>P = 0.273 | 1.184<br>(0.589–2.38)<br>P = 0.635   | 1.000<br>(1.000–1.000)<br>P = 0.002  | 1.004<br>(0.991–1.018)<br>P = 0.546  | 1.004<br>(0.974–1.036)<br>P = 0.782  | 0.618<br>(0.183–2.09)<br>P = 0.439  | 1.001<br>(0.996–1.006)<br>P = 0.630  | 1.290<br>(0.813–2.046)<br>P = 0.630   |                                     |

\* Hazard ratio (95%CI)

**Supplementary Table S15.** Kaplan-Meier survival analysis for RFS of non-TACE patients.

| Biomarkers                     | Cut-off                            |                                    |         |                                   |                                   |         |                                   |                                   |         |
|--------------------------------|------------------------------------|------------------------------------|---------|-----------------------------------|-----------------------------------|---------|-----------------------------------|-----------------------------------|---------|
|                                | Q1                                 |                                    |         | Median                            |                                   |         | Q3                                |                                   |         |
|                                | ≥ Q1                               | < Q1                               | P-Value | ≥ Q2                              | < Q2                              | P-Value | ≥ Q3                              | < Q3                              | P-Value |
| <b>cfD<sub>HCC</sub> Score</b> | 60.433 ± 5.587<br>(49.483-71.384)  | 38.947 ± 4.625<br>(29.882-48.012)  | 0.385   | 54.597 ± 6.440<br>(41.974-67.219) | 61.264 ± 6.735<br>(48.064-74.465) | 0.398   | 56.198 ± 9.386<br>(37.803-74.594) | 58.893 ± 5.941<br>(47.249-70.537) | 0.931   |
| <b>cfDNA</b>                   | 60.893 ± 5.589<br>(49.937-71.848)  | 37.460 ± 4.655<br>(28.335-46.584)  | 0.264   | 53.911 ± 6.171<br>(41.815-66.007) | 61.139 ± 7.372<br>(46.689-75.588) | 0.323   | 51.441 ± 9.534<br>(32.755-70.127) | 60.143 ± 5.956<br>(48.468-71.817) | 0.458   |
| <b>cfAFP DNA</b>               | 53.937 ± 5.601<br>(42.958-64.916)  | 69.902 ± 8.322<br>(53.590-86.214)  | 0.157   | 52.426 ± 5.685<br>(41.284-63.568) | 62.824 ± 8.209<br>(46.734-78.915) | 0.347   | 59.557 ± 6.913<br>(46.008-73.107) | 57.859 ± 7.065<br>(44.011-71.708) | 0.615   |
| <b>Total Protein</b>           | 55.736 ± 4.720<br>(46.486-64.986)  | 60.471 ± 10.581<br>(39.732-81.210) | 0.986   | 54.757 ± 5.815<br>(43.360-66.154) | 61.180 ± 7.272<br>(46.928-75.432) | 0.959   | 36.482 ± 4.181<br>(28.287-44.676) | 61.048 ± 5.593<br>(50.084-72.011) | 0.270   |
| <b>AFP</b>                     | 59.249 ± 6.860<br>(45.804-72.694)  | 60.631 ± 7.543<br>(45.846-75.415)  | 0.623   | 52.693 ± 6.505<br>(39.943-65.442) | 62.609 ± 7.047<br>(48.797-76.422) | 0.344   | 62.236 ± 9.389<br>(44.833-81.639) | 57.849 ± 5.822<br>(46.438-69.259) | 0.715   |
| <b>AST</b>                     | 54.503 ± 5.582<br>(43.563-65.443)  | 61.081 ± 5.291<br>(50.710-71.452)  | 0.062   | 54.678 ± 6.773<br>(41.403-67.953) | 53.175 ± 4.218<br>(44.908-61.442) | 0.266   | 50.158 ± 8.521<br>(33.456-66.859) | 61.638 ± 6.612<br>(48.680-74.597) | 0.314   |
| <b>ALT</b>                     | 59.304 ± 5.799<br>(47.939-70.670)  | 50.761 ± 5.930<br>(39.137-62.384)  | 0.998   | 63.159 ± 7.110<br>(49.222-77.095) | 48.195 ± 4.211<br>(39.941-56.449) | 0.559   | 54.860 ± 8.496<br>(38.209-71.512) | 59.357 ± 6.448<br>(46.720-71.995) | 0.636   |
| <b>Albumin</b>                 | 55.294 ± 4.727<br>(46.029-64.559)  | 56.451 ± 11.045<br>(34.803-78.100) | 0.870   | 59.576 ± 5.727<br>(48.351-70.801) | 55.374 ± 7.252<br>(41.160-69.589) | 0.259   | 58.031 ± 7.057<br>(44.199-71.862) | 59.681 ± 6.442<br>(47.054-72.308) | 0.630   |
| <b>ALP</b>                     | 52.664 ± 4.852<br>(43.155-62.173)  | 74.856 ± 11.338<br>(52.633-97.079) | 0.141   | 48.770 ± 4.937<br>(39.094-58.446) | 66.802 ± 7.135<br>(52.818-80.787) | 0.228   | 34.430 ± 4.409<br>(25.788-43.073) | 62.426 ± 5.607<br>(51.436-73.416) | 0.071   |
| <b>Bilirubin</b>               | 53.430 ± 45.167<br>(43.302-63.558) | 70.391 ± 10.693<br>(49.432-91.349) | 0.302   | 54.302 ± 6.220<br>(42.112-68.324) | 64.186 ± 8.006<br>(48.494-79.878) | 0.580   | 53.451 ± 8.886<br>(36.034-70.867) | 59.492 ± 6.178<br>(47.384-71.600) | 0.783   |

\* Survival duration ± S.D. (95% CI)

\*\* Units: Months

**Supplementary Table S16.** Kaplan-Meier survival analysis for marginal recurrence of non-TACE patients.

| Biomarkers                     | Cut-off                            |                                     |         |                                     |                                      |         |                                     |                                     |         |
|--------------------------------|------------------------------------|-------------------------------------|---------|-------------------------------------|--------------------------------------|---------|-------------------------------------|-------------------------------------|---------|
|                                | Q1                                 |                                     |         | Median                              |                                      |         | Q3                                  |                                     |         |
|                                | ≥ Q1                               | < Q1                                | P-Value | ≥ Q2                                | < Q2                                 | P-Value | ≥ Q3                                | < Q3                                | P-Value |
| <b>cfD<sub>HCC</sub> Score</b> | 98.823 ± 7.849<br>(84.440-114.206) | 59.680 ± 2.273<br>(55.225-64.135)   | 0.686   | 90.257 ± 6.013<br>(78.472-102.043)  | 108.274 ± 8.595<br>(91.428-125.119)  | 0.331   | 84.636 ± 10.221<br>(64.603-104.669) | 109.964 ± 7.303<br>(95.380-124.008) | 0.131   |
| <b>cfDNA</b>                   | 98.999 ± 7.829<br>(83.654-114.343) | 59.583 ± 2.366<br>(54.946-64.220)   | 0.746   | 90.772 ± 5.684<br>(79.632-101.911)  | 105.879 ± 10.194<br>(85.898-125.860) | 0.422   | 82.851 ± 11.427<br>(60.454-105.249) | 109.719 ± 7.300<br>(95.412-124.027) | 0.114   |
| <b>cfAFP DNA</b>               | 97.450 ± 8.173<br>(81.430-113.470) | 93.227 ± 3.686<br>(86.003-100.452)  | 0.479   | 94.850 ± 5.447<br>(84.173-105.526)  | 100.818 ± 10.260<br>(80.709-120.927) | 0.454   | 95.800 ± 6.977<br>(82.126-109.474)  | 102.449 ± 9.977<br>(82.894-122.003) | 0.539   |
| <b>Total Protein</b>           | 88.530 ± 3.936<br>(80.836-96.224)  | 100.524 ± 9.678<br>(81.555-119.492) | 0.822   | 86.253 ± 5.345<br>(75.777-96.728)   | 103.462 ± 8.061<br>(87.662-119.262)  | 0.653   | 55.750 ± 2.203<br>(51.433-60.067)   | 99.193 ± 7.809<br>(83.889-114.498)  | 0.814   |
| <b>AFP</b>                     | 99.430 ± 9.580<br>(80.653-118.207) | 81.936 ± 6.914<br>(68.384-95.488)   | 0.136   | 90.157 ± 8.826<br>(72.858-107.457)  | 103.398 ± 6.027<br>(96.585-120.211)  | 0.640   | 101.000 (101.000)                   | 104.770 ± 6.965<br>(91.118-118.421) | 0.381   |
| <b>AST</b>                     | 97.187 ± 8.298<br>(80.923-113.452) | 76.292 ± 2.651<br>(71.095-81.488)   | 0.448   | 104.977 ± 8.167<br>(88.970-120.984) | 72.164 ± 2.825<br>(66.626-77.701)    | 0.269   | 91.167 ± 8.007<br>(75.474-106.860)  | 108.220 ± 7.339<br>(93.836-122.604) | 0.514   |
| <b>ALT</b>                     | 98.716 ± 8.289<br>(82.470-114.962) | 73.274 ± 3.884<br>(65.661-80.887)   | 0.840   | 106.754 ± 7.817<br>(91.433-122.075) | 70.728 ± 3.537<br>(63.796-77.660)    | 0.223   | N/A (All Cases Censored)            |                                     |         |
| <b>Albumin</b>                 | 87.105 ± 4.554<br>(78.179-96.032)  | 97.467 ± 11.224<br>(75.457-119.466) | 0.655   | 89.403 ± 4.387<br>(80.804-98.001)   | 99.966 ± 8.453<br>(83.398-116.533)   | 0.469   | 91.500 ± 4.763<br>(82.164-100.836)  | 100.382 ± 7.857<br>(84.982-115.782) | 0.259   |
| <b>ALP</b>                     | 90.223 ± 5.338<br>(79.761-100.685) | 111.791 ± 6.889<br>(98.288-125.295) | 0.780   | 79.475 ± 5.182<br>(69.318-89.631)   | 106.761 ± 7.798<br>(91.476-122.046)  | 0.241   | 50.086 ± 5.037<br>(40.214-59.958)   | 104.163 ± 7.794<br>(88.887-119.439) | 0.002   |
| <b>Bilirubin</b>               | 94.349 ± 3.773<br>(86.955-101.743) | 103.274 ± 9.920<br>(83.831-122.717) | 0.796   | 91.543 ± 5.073<br>(81.600-101.483)  | 108.274 ± 8.595<br>(84.530-114.676)  | 0.391   | 92.428 ± 7.017<br>(78.675-106.181)  | 108.101 ± 7.352<br>(93.962-122.511) | 0.575   |

\* Survival duration ± S.D. (95% CI)

\*\* Units: Months

**Supplementary Table S17.** Kaplan-Meier survival analysis for multifocal recurrence of non-TACE patients.

| Biomarkers                     | Cut-off                             |                                     |         |                                    |                                     |         |                                    |                                     |         |
|--------------------------------|-------------------------------------|-------------------------------------|---------|------------------------------------|-------------------------------------|---------|------------------------------------|-------------------------------------|---------|
|                                | Q1                                  |                                     |         | Median                             |                                     |         | Q3                                 |                                     |         |
|                                | ≥ Q1                                | < Q1                                | P-Value | ≥ Q2                               | < Q2                                | P-Value | ≥ Q3                               | < Q3                                | P-Value |
| <b>cfD<sub>HCC</sub> Score</b> | 98.365 ± 7.287<br>(84.082-112.648)  | 49.652 ± 4.420<br>(40.988-58.315)   | 0.254   | 85.829 ± 5.248<br>(75.543-96.115)  | 91.630 ± 9.025<br>(73.942-109.318)  | 0.690   | 88.534 ± 6.700<br>(75.402-101.667) | 91.219 ± 8.477<br>(74.604-107.835)  | 0.554   |
| <b>cfDNA</b>                   | 98.505 ± 7.273<br>(84.251-112.760)  | 49.120 ± 4.579<br>(40.145-58.094)   | 0.214   | 82.769 ± 5.328<br>(72.317-93.202)  | 103.472 ± 5.989<br>(91.734-115.210) | 0.742   | 82.851 ± 6.700<br>(75.402-101.667) | 91.468 ± 8.467<br>(74.873-108.063)  | 0.605   |
| <b>cfAFP DNA</b>               | 104.347 ± 4.903<br>(94.747-113.956) | 79.078 ± 7.750<br>(63.887-94.269)   | 0.387   | 88.113 ± 4.519<br>(79.225-96.970)  | 88.224 ± 9.275<br>(70.045-106.403)  | 0.349   | 97.593 ± 3.344<br>(91.039-104.146) | 86.451 ± 8.508<br>(69.776-103.126)  | 0.023   |
| <b>Total Protein</b>           | 81.431 ± 4.052<br>(73.489-89.372)   | 106.696 ± 9.240<br>(90.545-122.846) | 0.510   | 84.440 ± 4.702<br>(75.224-93.656)  | 98.965 ± 6.870<br>(85.501-112.430)  | 0.743   | 49.408 ± 3.895<br>(41.773-57.042)  | 96.085 ± 7.274<br>(81.828-110.342)  | 0.854   |
| <b>AFP</b>                     | 98.758 ± 5.549<br>(87.882-109.634)  | 90.126 ± 5.713<br>(78.928-101.325)  | 0.322   | 78.126 ± 5.985<br>(66.395-89.857)  | 99.353 ± 9.019<br>(81.676-117.031)  | 0.097   | 78.389 ± 8.028<br>(62.655-94.123)  | 94.992 ± 8.126<br>(78.126-111.857)  | 0.320   |
| <b>AST</b>                     | 90.233 ± 7.457<br>(75.618-104.848)  | 76.346 ± 2.602<br>(71.246-81.447)   | 0.587   | 93.457 ± 8.424<br>(76.946-109.968) | 68.321 ± 3.473<br>(61.513-75.129)   | 0.646   | 83.611 ± 7.828<br>(68.268-98.955)  | 92.964 ± 8.527<br>(76.252-109.676)  | 0.903   |
| <b>ALT</b>                     | 93.774 ± 7.370<br>(79.328-108.219)  | 70.880 ± 4.399<br>(62.259-79.501)   | 0.458   | 89.996 ± 8.381<br>(73.569-106.422) | 70.679 ± 3.183<br>(64.441-76.918)   | 0.189   | 77.583 ± 8.414<br>(61.093-94.074)  | 104.296 ± 4.907<br>(94.678-113.913) | 0.287   |
| <b>Albumin</b>                 | 83.424 ± 3.751<br>(76.072-90.776)   | 97.467 ± 12.056<br>(70.641-117.902) | 0.659   | 87.254 ± 4.059<br>(79.299-95.210)  | 93.490 ± 7.783<br>(78.235-108.746)  | 0.190   | 85.761 ± 5.870<br>(45.280-62.329)  | 99.876 ± 5.743<br>(88.619-111.132)  | 0.960   |
| <b>ALP</b>                     | 81.571 ± 4.337<br>(73.071-90.070)   | 110.959 ± 7.387<br>(96.481-125.438) | 0.203   | 79.805 ± 4.259<br>(71.456-88.153)  | 93.096 ± 8.183<br>(77.058-109.134)  | 0.571   | 53.805 ± 4.349<br>(45.280-62.329)  | 95.530 ± 7.206<br>(81.405-109.654)  | 0.960   |
| <b>Bilirubin</b>               | 85.760 ± 4.044<br>(77.834-93.686)   | 94.318 ± 9.843<br>(75.027-113.610)  | 0.386   | 84.696 ± 5.098<br>(74.703-94.689)  | 101.284 ± 6.255<br>(89.024-115.543) | 0.912   | 80.974 ± 7.905<br>(65.480-96.468)  | 93.882 ± 8.582<br>(77.061-110.703)  | 0.628   |

\* Survival duration ± S.D. (95% CI)

\*\* Units: Months

**Supplementary Table S18.** Kaplan-Meier survival analysis for OS of non-TACE patients.

| Biomarkers           | Cut-off                                            |                                      |         |                                      |                                      |         |                                      |                                      |         |
|----------------------|----------------------------------------------------|--------------------------------------|---------|--------------------------------------|--------------------------------------|---------|--------------------------------------|--------------------------------------|---------|
|                      | Q1                                                 |                                      |         | Median                               |                                      |         | Q3                                   |                                      |         |
|                      | ≥ Q1                                               | < Q1                                 | P-Value | ≥ Q2                                 | < Q2                                 | P-Value | ≥ Q3                                 | < Q3                                 | P-Value |
| <b>cfDHCC Score</b>  | 120.383 ± 3.774<br>(112.986-127.780)               | 86.840 ± 4.379<br>(78.258-95.422)    | 0.807   | 97.682 ± 4.725<br>(88.420-106.943)   | 122.107 ± 5.619<br>(111.093-133.121) | 0.119   | 83.864 ± 7.645<br>(68.881-98.847)    | 83.864 ± 7.645<br>(114.732-131.343)  | 0.007   |
| <b>cfDNA</b>         | 120.521 ± 3.721<br>(113.227-127.815)               | 86.708 ± 4.557<br>(77.776-95.640)    | 0.750   | 98.015 ± 4.604<br>(88.992-107.038)   | 121.131 ± 6.353<br>(108.680-133.582) | 0.153   | 81.00 ± 7.882<br>(65.552-96.448)     | 124.068 ± 4.392<br>(115.459-132.676) | 0.001   |
| <b>cfAFP DNA</b>     | 117.922 ± 4.869<br>(108.379-127.466)               | 95.679 ± 4.982<br>(85.913-105.444)   | 0.970   | 100.222 ± 4.115<br>(92.157-108.288)  | 122.080 ± 4.450<br>(113.359-130.801) | 0.618   | 100.082 ± 4.110<br>(92.027-108.136)  | 119.231 ± 4.281<br>(110.841-127.621) | 0.612   |
| <b>Total Protein</b> | 118.342 ± 5.787<br>(107.000-129.684)               | 113.120 ± 8.035<br>(97.372-128.868)  | 0.458   | 117.743 ± 7.499<br>(103.044-132.442) | 115.689 ± 5.217<br>(105.463-125.915) | 0.482   | 83.891 ± 5.100<br>(73.895-93.888)    | 121.789 ± 3.552<br>(114.827-128.750) | 0.294   |
| <b>AFP</b>           | 114.843 ± 6.080<br>(102.926-126.759)               | 115.815 ± 4.107<br>(107.765-123.864) | 0.339   | 114.843 ± 6.080<br>(102.926-126.759) | 122.774 ± 3.637<br>(115.645-129.902) | 0.339   | 91.966 ± 5.985<br>(80.236-103.697)   | 119.895 ± 4.542<br>(110.994-128.796) | 0.307   |
| <b>AST</b>           | N/A (All Cases Censored)                           |                                      |         | 113.517 ± 5.553<br>(102.634-124.400) | 114.673 ± 10.862<br>(93.383-135.963) | 0.189   | 90.959 ± 7.694<br>(75.879-106.039)   | 120.332 ± 6.266<br>(108.049-132.614) | 0.0025  |
| <b>ALT</b>           | 116.790 ± 4.911<br>(107.165-126.416; P<br>= 0.464) | 115.963 ± 3.962<br>(108.198-123.728) | 0.464   | 116.167 ± 5.038<br>(106.292-126.042) | 117.591 ± 7.492<br>(102.906-132.276) | 0.508   | 102.250 ± 5.281<br>(91.900-112.600)  | 116.195 ± 6.003<br>(104.428-127.961) | 0.854   |
| <b>Albumin</b>       | 118.623 ± 5.370<br>(107.392-129.854)               | 110.567 ± 9.298<br>(92.343-128.792)  | 0.318   | 118.000 ± 7.451<br>(103.395-132.605) | 114.801 ± 5.558<br>(103.907-125.695) | 0.386   | 118.333 ± 7.822<br>(103.003-133.664) | 117.344 ± 4.173<br>(109.165-125.523) | 0.633   |
| <b>ALP</b>           | 118.418 ± 4.831<br>(108.950-127.886)               | 118.247 ± 6.584<br>(105.343-131.151) | 0.946   | 118.418 ± 5.720<br>(107.340-129.763) | 117.725 ± 4.919<br>(108.083-127.366) | 0.834   | 84.244 ± 5.913<br>(72.655-95.833)    | 123.660 ± 3.088<br>(117.608-129.712) | 0.047   |
| <b>Bilirubin</b>     | 107.623 ± 4.660<br>(98.489-116.756)                | 125.240 ± 4.664<br>(116.099-134.381) | 0.387   | 104.321 ± 4.245<br>(110.001-126.641) | 125.365 ± 3.217<br>(119.059-131.671) | 0.169   | 106.847 ± 7.135<br>(92.863-120.831)  | 118.980 ± 5.091<br>(109.001-128.958) | 0.427   |

\* Survival duration ± S.D. (95% CI)

\*\* Units: Months

**Supplementary Table S19.** Univariate Cox regression analysis of the serum and plasma biomarkers for non-TACE patients.

| HR(95%CI)             | Cut-off         |                 | cfDHCC Score                         | cfDNA                                | cfAFP DNA                            | Total Protein                       | AFP                                  | AST                                    | ALT                                  | Albumin                             | ALP                                  | Bilirubin                            |
|-----------------------|-----------------|-----------------|--------------------------------------|--------------------------------------|--------------------------------------|-------------------------------------|--------------------------------------|----------------------------------------|--------------------------------------|-------------------------------------|--------------------------------------|--------------------------------------|
| Recurrence            | Non-categorical |                 | 0.923<br>(0.692–1.231)<br>P = 0.586  | 0.981<br>(0.909–1.059)<br>P = 0.622  | 0.987<br>(0.913–1.068)<br>P = 0.749  | 1.091<br>(0.825–1.443)<br>P = 0.540 | 1.000<br>(0.999–1.000)<br>P = 0.414  | 1.001<br>(0.998–1.004)<br>P = 0.527    | 1.000<br>(0.996–1.004)<br>P = 0.961  | 0.938<br>(0.581–1.515)<br>P = 0.794 | 1.012<br>(1.004–1.02)<br>P = 0.004   | 0.979<br>(0.688–1.392)<br>P = 0.004  |
|                       | Categorical     | Q1              | 0.746<br>(0.381–1.457)<br>P = 0.390  | 0.685<br>(0.350–1.343)<br>P = 0.271  | 1.678<br>(0.809–3.48)<br>P = 0.164   | 1.006<br>(0.518–1.955)<br>P = 0.986 | 1.173<br>(0.618–2.228)<br>P = 0.625  | 2.029<br>(0.944–4.358)<br>P = 0.070    | 0.997<br>(0.516–1.928)<br>P = 0.993  | 0.944<br>(0.469–1.898)<br>P = 0.871 | 1.710<br>(0.826–3.542)<br>P = 0.149  | 1.428<br>(0.72–2.833)<br>P = 0.149   |
|                       |                 | Med             | 1.271<br>(0.725–2.229)<br>P = 0.403  | 1.326<br>(0.754–2.332)<br>P = 0.328  | 1.313<br>(0.740–2.328)<br>P = 0.352  | 1.015<br>(0.574–1.795)<br>P = 0.959 | 1.309<br>(0.746–2.296)<br>P = 0.349  | 1.387<br>(0.774–2.487)<br>P = 0.272    | 0.841<br>(0.468–1.512)<br>P = 0.563  | 0.723<br>(0.408–1.278)<br>P = 0.264 | 1.424<br>(0.795–2.551)<br>P = 0.234  | 1.171<br>(0.666–2.059)<br>P = 0.234  |
|                       |                 | Q3              | 1.029<br>(0.535–1.98)<br>P = 0.931   | 1.271<br>(0.671–2.409)<br>P = 0.462  | 0.857<br>(0.468–1.570)<br>P = 0.617  | 1.452<br>(0.741–2.844)<br>P = 0.277 | 0.883<br>(0.449–1.733)<br>P = 0.717  | 1.365<br>(0.74–2.52)<br>P = 0.319      | 1.163<br>(0.619–2.182)<br>P = 0.639  | 0.861<br>(0.467–1.589)<br>P = 0.633 | 1.826<br>(0.935–3.566)<br>P = 0.078  | 1.091<br>(0.584–2.038)<br>P = 0.078  |
|                       |                 | Non-categorical |                                      | 1.423<br>(0.919–2.202)<br>P = 0.113  | 1.101<br>(0.981–1.235)<br>P = 0.103  | 0.979<br>(0.782–1.225)<br>P = 0.853 | 0.955<br>(0.490–1.863)<br>P = 0.894  | 0.997<br>(0.990–1.005)<br>P = 0.483    | 0.999<br>(0.99–1.009)<br>P = 0.883   | 0.986<br>(0.964–1.009)<br>P = 0.230 | 0.639<br>(0.184–2.218)<br>P = 0.480  | 1.023<br>(1.004–1.042)<br>P = 0.018  |
| Marginal Recurrence   | Categorical     | Q1              | 1.551<br>(0.180–13.375)<br>P = 0.690 | 1.424<br>(0.164–12.337)<br>P = 0.749 | 2.120<br>(0.251–17.945)<br>P = 0.490 | 0.828<br>(0.159–4.309)<br>P = 0.823 | 0.333<br>(0.073–1.518)<br>P = 0.156  | 2.216<br>(0.266–18.451)<br>P = 0.462   | 0.845<br>(0.163–4.373)<br>P = 0.840  | 0.684<br>(0.128–3.669)<br>P = 0.658 | 1.260<br>(0.246–6.449)<br>P = 0.781  | 0.821<br>(0.184–3.668)<br>P = 0.781  |
|                       |                 | Med             | 2.007<br>(0.477–8.444)<br>P = 0.342  | 1.780<br>(0.425–7.459)<br>P = 0.430  | 0.583<br>(0.139–2.446)<br>P = .461   | 1.409<br>(0.312–6.352)<br>P = 0.656 | 0.712<br>(0.17–2.988)<br>P = 0.642   | 0.407<br>(0.078–2.122)<br>P = 0.286    | 0.372<br>(0.071–1.951)<br>P = 0.242  | 0.578<br>(0.128–2.605)<br>P = 0.475 | 2.575<br>(0.497–13.345)<br>P = 0.260 | 1.857<br>(0.441–7.825)<br>P = 0.260  |
|                       |                 | Q3              | 2.834<br>(0.692–11.607)<br>P = 0.147 | 2.970<br>(0.722–12.209)<br>P = 0.131 | 0.604<br>(0.119–3.07)<br>P = 0.544   | 0.772<br>(0.088–6.742)<br>P = 0.815 | 0.398<br>(0.047–3.363)<br>P = 0.397  | 1.620<br>(0.375–6.995)<br>P = 0.518    | 0.029<br>(–34.024)<br>P = 0.327      | 0.313<br>(0.037–2.639)<br>P = 0.286 | 9.004<br>(1.621–50.009)<br>P = 0.012 | 1.515<br>(0.350–6.564)<br>P = 0.012  |
|                       |                 | Non-categorical |                                      | 0.746<br>(0.378–1.475)<br>P = 0.400  | 0.932<br>(0.781–1.111)<br>P = 0.431  | 0.769<br>(0.597–0.992)<br>P = 0.043 | 1.084<br>(0.681–1.726)<br>P = 0.732  | 0.999<br>(0.996–1.001)<br>P = 0.339    | 1.002<br>(0.997–1.006)<br>P = 0.489  | 1.001<br>(0.995–1.007)<br>P = 0.679 | 0.599<br>(0.258–1.389)<br>P = 0.232  | 1.004<br>(0.989–1.019)<br>P = 0.600  |
| Multifocal Recurrence | Categorical     | Q1              | 0.560<br>(0.203–1.542)<br>P = 0.262  | 0.533<br>(0.194–1.466)<br>P = 0.223  | 0.647<br>(0.239–1.752)<br>P = 0.391  | 1.537<br>(0.423–5.585)<br>P = 0.514 | 1.857<br>(0.533–6.47)<br>P = 0.331   | 6.338<br>(0.837–48.011)<br>P = 0.074   | 1.599<br>(0.456–5.613)<br>P = 0.464  | 0.769<br>(0.239–2.479)<br>P = 0.660 | 2.520<br>(0.575–11.031)<br>P = 0.220 | 0.636<br>(0.235–1.722)<br>P = 0.220  |
|                       |                 | Med             | 0.822<br>(0.312–2.165)<br>P = 0.692  | 1.174<br>(0.451–3.054)<br>P = 0.743  | 0.632<br>(0.24–1.669)<br>P = 0.355   | 0.853<br>(0.328–2.219)<br>P = 0.744 | 2.274<br>(0.838–6.170)<br>P = 0.107  | 1.257<br>(0.471–3.353)<br>P = 0.648    | 1.943<br>(0.706–5.348)<br>P = 0.199  | 0.529<br>(0.200–1.396)<br>P = 0.198 | 0.753<br>(0.280–2.022)<br>P = 0.573  | 0.948<br>(0.364–2.467)<br>P = 0.573  |
|                       |                 | Q3              | 0.688<br>(0.197–2.398)<br>P = 0.557  | 0.721<br>(0.207–2.515)<br>P = 0.608  | 0.135<br>(0.018–1.023)<br>P = 0.053  | 1.112<br>(0.359–3.448)<br>P = 0.854 | 1.648<br>(0.608–4.465)<br>P = 0.326  | 1.046<br>(0.340–3.218)<br>P = 0.937    | 1.706<br>(0.630–4.623)<br>P = 0.294  | 0.827<br>(0.291–2.347)<br>P = 0.721 | 0.969<br>(0.276–3.401)<br>P = 0.960  | 1.293<br>(0.455–3.680)<br>P = 0.960  |
|                       |                 | Non-categorical |                                      | 1.871<br>(1.384–2.528)<br>P < 0.0001 | 1.166<br>(1.073–1.267)<br>P < 0.0001 | 0.908<br>(0.689–1.198)<br>P = 0.496 | 0.819<br>(0.464–1.446)<br>P = 0.491  | 1.000<br>(1.000–1.000)<br>P = 0.001    | 1.005<br>(1.000–1.009)<br>P = 0.043  | 1.001<br>(0.992–1.010)<br>P = 0.768 | 0.643<br>(0.195–2.128)<br>P = 0.470  | 1.008<br>(1.004–1.012)<br>P < 0.0001 |
| Survival              | Categorical     | Q1              | 0.818<br>(0.162–4.13)<br>P = 0.808   | 0.770<br>(0.152–3.887)<br>P = 0.751  | 0.970<br>(0.192–4.905)<br>P = 0.970  | 0.583<br>(0.137–2.474)<br>P = 0.464 | 2.682<br>(0.327–22.019)<br>P = 0.358 | 31.989<br>(0.030–33687.4)<br>P = 0.329 | 2.154<br>(0.262–17.692)<br>P = 0.475 | 0.484<br>(0.113–2.074)<br>P = 0.329 | 0.946<br>(0.19–4.715)<br>P = 0.946   | 2.446<br>(0.300–19.939)<br>P = 0.946 |
|                       |                 | Med             | 3.317<br>(0.668–16.461)<br>P = 0.142 | 3.030<br>(0.611–15.012)<br>P = 0.175 | 1.438<br>(0.341–6.056)<br>P = 0.621  | 0.602<br>(0.143–2.526)<br>P = 0.488 | 3.276<br>(0.66–16.264)<br>P = 0.147  | 2.818<br>(0.561–14.157)<br>P = 0.208   | 1.615<br>(0.385–6.784)<br>P = 0.513  | 0.535<br>(0.127–2.252)<br>P = 0.394 | 0.862<br>(0.214–3.471)<br>P = 0.834  | 2.922<br>(0.588–14.512)<br>P = 0.832 |
|                       |                 | Q3              | 5.783<br>(1.377–24.296)<br>P = 0.017 | 9.573<br>(1.930–47.470)<br>P = 0.006 | 0.656<br>(0.127–3.387)<br>P = 0.615  | 2.138<br>(0.499–9.163)<br>P = 0.306 | 2.094<br>(0.49–8.948)<br>P = 0.318   | 4.585<br>(1.074–19.579)<br>P = 0.040   | 0.860<br>(0.171–4.309)<br>P = 0.854  | 0.678<br>(0.136–3.374)<br>P = 0.635 | 3.734<br>(0.923–15.107)<br>P = 0.065 | 1.773<br>(0.423–7.437)<br>P = 0.065  |
|                       |                 | Non-categorical |                                      | 1.871<br>(1.384–2.528)<br>P < 0.0001 | 1.166<br>(1.073–1.267)<br>P < 0.0001 | 0.908<br>(0.689–1.198)<br>P = 0.496 | 0.819<br>(0.464–1.446)<br>P = 0.491  | 1.000<br>(1.000–1.000)<br>P = 0.001    | 1.005<br>(1.000–1.009)<br>P = 0.043  | 1.001<br>(0.992–1.010)<br>P = 0.768 | 0.643<br>(0.195–2.128)<br>P = 0.470  | 1.008<br>(1.004–1.012)<br>P < 0.0001 |

\* Hazard ratio (95%CI)



**Supplementary Table S20.** Univariate Cox regression analysis of the serum and plasma biomarkers for all patients.

| Cut-off             |                       |             | cfDHCC Score                        | cfDNA                               | cfAFP DNA                           | Total Protein                        | AFP                                  | AST                                  | ALT                                  | Albumin                             | ALP                                 | Bilirubin                            |
|---------------------|-----------------------|-------------|-------------------------------------|-------------------------------------|-------------------------------------|--------------------------------------|--------------------------------------|--------------------------------------|--------------------------------------|-------------------------------------|-------------------------------------|--------------------------------------|
| Recurrence          | Non-categorical       |             | 1.081<br>(0.884–1.321)<br>P = 0.447 | 1.005<br>(0.949–1.065)<br>P = 0.854 | 1.001<br>(0.947–1.058)<br>P = 0.964 | 1.226<br>(0.981–1.533)<br>P = 0.073  | 1.000<br>(1.000–1.000)<br>P = 0.002  | 1.000<br>(0.998–1.003)<br>P = 0.904  | 0.997<br>(0.994–1.001)<br>P = 0.202  | 0.923<br>(0.627–1.359)<br>P = 0.686 | 1.005<br>(1.003–1.008)<br>P < 0.001 | 1.099<br>(0.875–1.381)<br>P = 0.416  |
|                     | Categorical           | Q1          | 0.930<br>(0.558–1.547)<br>P = 0.779 | 0.809<br>(0.484–1.349)<br>P = 0.416 | 1.754<br>(1.010–3.045)<br>P = 0.046 | 1.393<br>(0.799–2.426)<br>P = 0.242  | 1.253<br>(0.767–2.048)<br>P = 0.368  | 1.681<br>(0.957–2.954)<br>P = 0.071  | 0.763<br>(0.470–1.240)<br>P = 0.275  | 0.881<br>(0.514–1.510)<br>P = 0.881 | 1.906<br>(1.071–3.391)<br>P = 0.028 | 1.472<br>(0.877–2.471)<br>P = 0.144  |
|                     |                       |             | Med                                 | 1.406<br>(0.913–2.166)<br>P = 0.122 | 1.346<br>(0.873–2.078)<br>P = 0.179 | 1.126<br>(0.729–1.738)<br>P = 0.594  | 1.178<br>(0.758–1.828)<br>P = 0.467  | 1.303<br>(0.847–2.007)<br>P = 0.229  | 1.134<br>(0.729–1.761)<br>P = 0.577  | 0.712<br>(0.457–1.109)<br>P = 0.133 | 0.793<br>(0.513–1.226)<br>P = 0.298 | 1.905<br>(1.223–2.968)<br>P = 0.004  |
|                     |                       | Q3          |                                     | 1.175<br>(0.715–1.931)<br>P = 0.524 | 1.185<br>(0.714–1.966)<br>P = 0.512 | 1.038<br>(0.651–1.655)<br>P = 0.876  | 1.862<br>(1.155–3.000)<br>P = 0.011  | 1.253<br>(0.767–2.048)<br>P = 0.368  | 1.213<br>(0.748–1.965)<br>P = 0.434  | 0.746<br>(0.445–1.249)<br>P = 0.264 | 0.851<br>(0.531–1.363)<br>P = 0.501 | 2.485<br>(1.536–4.018)<br>P = 0.001  |
|                     |                       |             | Non-categorical                     |                                     | 1.277<br>(0.944–1.726)<br>P = 0.113 | 1.041<br>(0.951–1.139)<br>P = 0.389  | 0.986<br>(0.882–1.104)<br>P = 0.811  | 1.578<br>(1.012–2.461)<br>P = 0.044  | 1.000<br>(1.000–1.000)<br>P = 0.003  | 0.997<br>(0.989–1.004)<br>P = 0.357 | 0.987<br>(0.974–1.000)<br>P = 0.050 | 0.855<br>(0.415–1.766)<br>P = 0.671  |
| Marginal Recurrence | Categorical           | Q1          | 1.598<br>(0.543–4.702)<br>P = 0.395 | 1.094<br>(0.405–2.956)<br>P = 0.859 | 2.881<br>(0.855–9.702)<br>P = 0.088 | 3.451<br>(0.808–14.741)<br>P = 0.095 | 0.898<br>(0.382–2.110)<br>P = 0.804  | 1.830<br>(0.624–5.369)<br>P = 0.271  | 0.901<br>(0.357–2.275)<br>P = 0.826  | 0.863<br>(0.318–2.348)<br>P = 0.774 | 2.861<br>(0.852–9.616)<br>P = 0.089 | 1.135<br>(0.467–2.761)<br>P = 0.780  |
|                     |                       |             | Med                                 | 1.549<br>(0.702–3.420)<br>P = 0.278 | 1.655<br>(0.743–3.687)<br>P = 0.218 | 1.040<br>(0.474–2.280)<br>P = 0.923  | 2.637<br>(1.042–6.675)<br>P = 0.041  | 1.265<br>(0.577–2.775)<br>P = 0.557  | 0.648<br>(0.283–1.487)<br>P = 0.306  | 0.623<br>(0.275–1.412)<br>P = 0.257 | 0.888<br>(0.397–1.987)<br>P = 0.772 | 3.161<br>(1.309–7.636)<br>P = 0.011  |
|                     |                       | Q3          |                                     | 1.319<br>(0.546–3.183)<br>P = 0.538 | 1.087<br>(0.430–2.751)<br>P = 0.860 | 0.767<br>(0.304–1.930)<br>P = 0.573  | 2.929<br>(1.266–6.776)<br>P = 0.012  | 0.898<br>(0.382–2.110)<br>P = 0.804  | 0.764<br>(0.384–2.057)<br>P = 0.594  | 0.235<br>(0.055–1.000)<br>P = 0.050 | 0.808<br>(0.334–1.953)<br>P = 0.636 | 5.319<br>(2.318–12.209)<br>P = 0.001 |
|                     |                       |             | Non-categorical                     |                                     | 1.099<br>(0.793–1.525)<br>P = 0.570 | 0.993<br>(0.896–1.101)<br>P = 0.899  | 0.973<br>(0.879–1.077)<br>P = 0.599  | 1.359<br>(0.938–1.968)<br>P = 0.105  | 1.000<br>(1.000–1.000)<br>P = 0.005  | 1.000<br>(0.995–1.004)<br>P = 0.960 | 0.998<br>(0.992–1.004)<br>P = 0.513 | 0.728<br>(0.386–1.371)<br>P = 0.325  |
|                     | Multifocal Recurrence | Categorical | Q1                                  | 0.977<br>(0.437–2.185)<br>P = 0.955 | 0.762<br>(0.350–1.656)<br>P = 0.762 | 1.153<br>(0.512–2.598)<br>P = 0.732  | 2.237<br>(0.769–6.508)<br>P = 0.139  | 1.524<br>(0.658–3.530)<br>P = 0.325  | 2.609<br>(0.793–5.394)<br>P = .137   | 0.773<br>(0.356–1.680)<br>P = 0.516 | 0.798<br>(0.336–1.893)<br>P = 0.609 | 1.594<br>(0.656–3.876)<br>P = 0.752  |
| Med                 |                       |             |                                     | 1.568<br>(0.779–3.158)<br>P = 0.482 | 1.805<br>(0.881–3.698)<br>P = 0.107 | 0.827<br>(0.427–1.660)<br>P = 0.592  | 1.248<br>(0.614–2.536)<br>P = 0.540  | 1.976<br>(0.965–4.047)<br>P = 0.063  | 0.954<br>(0.470–1.938)<br>P = 0.897  | 0.887<br>(0.438–1.796)<br>P = 0.887 | 0.757<br>(0.378–1.519)<br>P = 0.434 | 1.380<br>(0.681–2.795)<br>P = 0.371  |
|                     |                       |             | Q3                                  | 0.991<br>(0.428–2.295)<br>P = 0.984 | 0.991<br>(0.434–2.329)<br>P = 0.991 | 0.686<br>(0.296–1.590)<br>P = 0.686  | 1.925<br>(0.928–3.992)<br>P = 0.079  | 1.524<br>(0.658–3.530)<br>P = 0.325  | 1.090<br>(0.483–2.461)<br>P = 0.835  | 0.745<br>(0.322–1.723)<br>P = 0.491 | 0.899<br>(0.425–1.899)<br>P = 0.780 | 1.986<br>(0.909–4.340)<br>P = 0.085  |
| Non-categorical     |                       |             |                                     | 1.731<br>(1.401–2.139)<br>P = 0.001 | 1.129<br>(1.061–1.202)<br>P < 0.001 | 0.945<br>(0.813–1.098)<br>P = 0.45   | 1.094<br>(0.714–1.676)<br>P = 0.681  | 1.000<br>(1.000–1.000)<br>P = 0.001  | 1.003<br>(0.999–1.007)<br>P = 0.214  | 0.997<br>(0.988–1.005)<br>P = 0.475 | 0.643<br>(0.294–1.458)<br>P = 0.291 | 1.006<br>(1.003–1.008)<br>P = 0.001  |
| Survival            |                       | Categorical | Q1                                  | 1.624<br>(0.471–5.599)<br>P = 0.442 | 1.077<br>(0.356–3.262)<br>P = 0.895 | 1.420<br>(0.486–4.303)<br>P = 0.536  | 1.614<br>(0.463–5.621)<br>P = 0.452  | 3.311<br>(0.763–14.368)<br>P = 0.110 | 5.585<br>(0.743–41.999)<br>P = 0.095 | 1.188<br>(0.393–3.593)<br>P = 0.760 | 0.447<br>(0.174–1.146)<br>P = 0.094 | 1.712<br>(0.498–5.885)<br>P = 0.394  |
|                     | Med                   |             |                                     | 2.524<br>(0.959–6.645)<br>P = 0.061 | 2.221<br>(0.844–5.845)<br>P = 0.106 | 1.854<br>(0.703–4.892)<br>P = 0.212  | 0.985<br>(0.399–2.430)<br>P = 0.973  | 3.119<br>(1.123–8.666)<br>P = 0.029  | 1.368<br>(0.547–3.423)<br>P = 0.503  | 0.721<br>(0.288–1.807)<br>P = 0.486 | 0.654<br>(0.262–1.632)<br>P = 0.363 | 2.330<br>(0.885–6.139)<br>P = 0.087  |
|                     |                       |             | Q3                                  | 3.290<br>(1.334–8.110)<br>P = 0.010 | 3.282<br>(1.331–8.094)<br>P = 0.010 | 0.651<br>(0.215–1.970)<br>P = 0.448  | 2.087<br>(0.883–5.234)<br>P = 0.117  | 3.311<br>(0.763–14.368)<br>P = 0.110 | 1.687<br>(0.654–4.352)<br>P = 0.279  | 0.511<br>(0.148–1.759)<br>P = 0.287 | 0.979<br>(0.371–2.579)<br>P = 0.965 | 5.808<br>(2.325–14.509)<br>P = 0.001 |
|                     | Non-categorical       |             |                                     | 1.731<br>(1.401–2.139)<br>P = 0.001 | 1.129<br>(1.061–1.202)<br>P < 0.001 | 0.945<br>(0.813–1.098)<br>P = 0.45   | 1.094<br>(0.714–1.676)<br>P = 0.681  | 1.000<br>(1.000–1.000)<br>P = 0.001  | 1.003<br>(0.999–1.007)<br>P = 0.214  | 0.997<br>(0.988–1.005)<br>P = 0.475 | 0.643<br>(0.294–1.458)<br>P = 0.291 | 1.006<br>(1.003–1.008)<br>P = 0.001  |
|                     | Non-categorical       |             | 1.624<br>(0.471–5.599)<br>P = 0.442 | 1.077<br>(0.356–3.262)<br>P = 0.895 | 1.420<br>(0.486–4.303)<br>P = 0.536 | 1.614<br>(0.463–5.621)<br>P = 0.452  | 3.311<br>(0.763–14.368)<br>P = 0.110 | 5.585<br>(0.743–41.999)<br>P = 0.095 | 1.188<br>(0.393–3.593)<br>P = 0.760  | 0.447<br>(0.174–1.146)<br>P = 0.094 | 1.712<br>(0.498–5.885)<br>P = 0.394 | 6.422<br>(0.857–48.138)<br>P = 0.070 |

\* Hazard ratio (95%CI)
